# Supplementary material for: SYNJ2 is a novel and potential biomarker for the prediction and treatment of cancers: from lung squamous cell carcinoma to pan-cancer
Source: BMC Med Genomics. 2022 May 17;15:114. doi: 10.1186/s12920-022-01266-0 (PMC9112447; doi:10.1186/s12920-022-01266-0)
Supplement: Supplementary file 2 — Additional file 2. Datasets collected for LUSC. [file 12920_2022_1266_MOESM2_ESM.xlsx]

## Sheet: Sheet1
Merged dataset	Raw dataset	Platform	n of LUSC	n of non-LUSC	Link
HG-U133_Plus_2	E-MTAB-5231	Affymetrix GeneChip Human Genome U133 Plus 2.0	11	7	https://www.ebi.ac.uk/arrayexpress/experiments/E-MTAB-5231/
GPL10558	GSE29249	Illumina HumanHT-12 V4.0 expression beadchip	3	6	https://www.ncbi.nlm.nih.gov/geo/query/acc.cgi?acc=GSE29249
GPL13158	GSE103512	Affymetrix HT HG-U133+ PM Array Plate	25	4	https://www.ncbi.nlm.nih.gov/geo/query/acc.cgi?acc=GSE103512
GPL13497	GSE74706	Agilent-026652 Whole Human Genome Microarray 4x44K v2	8	18	https://www.ncbi.nlm.nih.gov/geo/query/acc.cgi?acc=GSE74706
GPL15974	GSE40275	Human Exon 1.0 ST Array	4	43	https://www.ncbi.nlm.nih.gov/geo/query/acc.cgi?acc=GSE40275
GPL16791	GSE81089	Illumina HiSeq 2500 (Homo sapiens)	67	19	https://www.ncbi.nlm.nih.gov/geo/query/acc.cgi?acc=GSE81089
GPL201	GSE6044	Affymetrix Human HG-Focus Target Array	10	5	https://www.ncbi.nlm.nih.gov/geo/query/acc.cgi?acc=GSE6044
GPL7015	GSE11969	Agilent Homo sapiens 21.6K custom array	35	5	https://www.ncbi.nlm.nih.gov/geo/query/acc.cgi?acc=GSE11969
GPL11154	GSE84776	Illumina HiSeq 2000 (Homo sapiens)	9	9	https://www.ncbi.nlm.nih.gov/geo/query/acc.cgi?acc=GSE84776
	GSE70089		0	3	https://www.ncbi.nlm.nih.gov/geo/query/acc.cgi?acc=GSE70089
GPL570	GSE19188	Affymetrix Human Genome U133 Plus 2.0 Array	27	65	https://www.ncbi.nlm.nih.gov/geo/query/acc.cgi?acc=GSE19188
	GSE19804		0	60	https://www.ncbi.nlm.nih.gov/geo/query/acc.cgi?acc=GSE19804
	GSE30219		61	14	https://www.ncbi.nlm.nih.gov/geo/query/acc.cgi?acc=GSE30219
	GSE18842		0	45	https://www.ncbi.nlm.nih.gov/geo/query/acc.cgi?acc=GSE18842
	GSE101929		0	34	https://www.ncbi.nlm.nih.gov/geo/query/acc.cgi?acc=GSE101929
	GSE157010		235	0	https://www.ncbi.nlm.nih.gov/geo/query/acc.cgi?acc=GSE157010
	GSE106937		1	4	https://www.ncbi.nlm.nih.gov/geo/query/acc.cgi?acc=GSE106937
	GSE18385		0	161	https://www.ncbi.nlm.nih.gov/geo/query/acc.cgi?acc=GSE18385
	GSE33532		16	20	https://www.ncbi.nlm.nih.gov/geo/query/acc.cgi?acc=GSE33532
	GSE50081		43	0	https://www.ncbi.nlm.nih.gov/geo/query/acc.cgi?acc=GSE50081
	GSE43580		73	0	https://www.ncbi.nlm.nih.gov/geo/query/acc.cgi?acc=GSE43580
	GSE37745		66	0	https://www.ncbi.nlm.nih.gov/geo/query/acc.cgi?acc=GSE37745
	GSE28571		28	0	https://www.ncbi.nlm.nih.gov/geo/query/acc.cgi?acc=GSE28571
	GSE29013		25	0	https://www.ncbi.nlm.nih.gov/geo/query/acc.cgi?acc=GSE29013
	GSE10245		18	0	https://www.ncbi.nlm.nih.gov/geo/query/acc.cgi?acc=GSE10245
	GSE2109		6	0	https://www.ncbi.nlm.nih.gov/geo/query/acc.cgi?acc=GSE2109
	GSE27556		2	0	https://www.ncbi.nlm.nih.gov/geo/query/acc.cgi?acc=GSE27556
GPL6244	GSE31552	Affymetrix Human Gene 1.0 ST Array	25	62	https://www.ncbi.nlm.nih.gov/geo/query/acc.cgi?acc=GSE31552
	GSE44077		0	66	https://www.ncbi.nlm.nih.gov/geo/query/acc.cgi?acc=GSE44077
GPL6480	GSE51852	Agilent-014850 Whole Human Genome Microarray 4x44K G4112F	28	4	https://www.ncbi.nlm.nih.gov/geo/query/acc.cgi?acc=GSE51852
	GSE33479		14	27	https://www.ncbi.nlm.nih.gov/geo/query/acc.cgi?acc=GSE33479
	GSE101420		0	60	https://www.ncbi.nlm.nih.gov/geo/query/acc.cgi?acc=GSE101420
	GSE73403		69	0	https://www.ncbi.nlm.nih.gov/geo/query/acc.cgi?acc=GSE73403
	GSE40074		24	0	https://www.ncbi.nlm.nih.gov/geo/query/acc.cgi?acc=GSE40074
	GSE40588		0	60	https://www.ncbi.nlm.nih.gov/geo/query/acc.cgi?acc=GSE40588
TCGA-GTEx	TCGA	Illumina	502	49	https://portal.gdc.cancer.gov/
	GTEx		0	578	https://gtexportal.org/home/index.html
