# Supplementary material for: SYNJ2 is a novel and potential biomarker for the prediction and treatment of cancers: from lung squamous cell carcinoma to pan-cancer
Source: BMC Med Genomics. 2022 May 17;15:114. doi: 10.1186/s12920-022-01266-0 (PMC9112447; doi:10.1186/s12920-022-01266-0)
Supplement: Supplementary file 3 — Additional file 3. The details of the 32 cancers in this study. [file 12920_2022_1266_MOESM3_ESM.xlsx]

## Sheet: Sheet1
Group	Cancer	Sample ID	Normal sample number	Cancer sample number
Tumor	ACC	TCGA-OR-A5K3-01	0	77
Tumor	ACC	TCGA-OR-A5J2-01	0	77
Tumor	ACC	TCGA-OR-A5LN-01	0	77
Tumor	ACC	TCGA-OR-A5KY-01	0	77
Tumor	ACC	TCGA-OR-A5LG-01	0	77
Tumor	ACC	TCGA-OR-A5JC-01	0	77
Tumor	ACC	TCGA-OR-A5JV-01	0	77
Tumor	ACC	TCGA-OU-A5PI-01	0	77
Tumor	ACC	TCGA-OR-A5KO-01	0	77
Tumor	ACC	TCGA-OR-A5JP-01	0	77
Tumor	ACC	TCGA-OR-A5L9-01	0	77
Tumor	ACC	TCGA-OR-A5JO-01	0	77
Tumor	ACC	TCGA-OR-A5JX-01	0	77
Tumor	ACC	TCGA-PA-A5YG-01	0	77
Tumor	ACC	TCGA-OR-A5LD-01	0	77
Tumor	ACC	TCGA-OR-A5LL-01	0	77
Tumor	ACC	TCGA-OR-A5K8-01	0	77
Tumor	ACC	TCGA-OR-A5KW-01	0	77
Tumor	ACC	TCGA-OR-A5J9-01	0	77
Tumor	ACC	TCGA-OR-A5L8-01	0	77
Tumor	ACC	TCGA-OR-A5J6-01	0	77
Tumor	ACC	TCGA-OR-A5JJ-01	0	77
Tumor	ACC	TCGA-OR-A5LJ-01	0	77
Tumor	ACC	TCGA-OR-A5JM-01	0	77
Tumor	ACC	TCGA-PK-A5HB-01	0	77
Tumor	ACC	TCGA-OR-A5JF-01	0	77
Tumor	ACC	TCGA-OR-A5K9-01	0	77
Tumor	ACC	TCGA-OR-A5LM-01	0	77
Tumor	ACC	TCGA-OR-A5KZ-01	0	77
Tumor	ACC	TCGA-PK-A5H8-01	0	77
Tumor	ACC	TCGA-OR-A5J7-01	0	77
Tumor	ACC	TCGA-P6-A5OG-01	0	77
Tumor	ACC	TCGA-OR-A5K1-01	0	77
Tumor	ACC	TCGA-OR-A5LT-01	0	77
Tumor	ACC	TCGA-OR-A5L6-01	0	77
Tumor	ACC	TCGA-OR-A5JW-01	0	77
Tumor	ACC	TCGA-OR-A5LE-01	0	77
Tumor	ACC	TCGA-OR-A5JA-01	0	77
Tumor	ACC	TCGA-OR-A5J5-01	0	77
Tumor	ACC	TCGA-OR-A5JZ-01	0	77
Tumor	ACC	TCGA-OR-A5JI-01	0	77
Tumor	ACC	TCGA-OR-A5LA-01	0	77
Tumor	ACC	TCGA-PK-A5HA-01	0	77
Tumor	ACC	TCGA-OR-A5JQ-01	0	77
Tumor	ACC	TCGA-OR-A5JE-01	0	77
Tumor	ACC	TCGA-OR-A5KU-01	0	77
Tumor	ACC	TCGA-OR-A5LB-01	0	77
Tumor	ACC	TCGA-OR-A5K5-01	0	77
Tumor	ACC	TCGA-OR-A5J8-01	0	77
Tumor	ACC	TCGA-OR-A5L5-01	0	77
Tumor	ACC	TCGA-OR-A5J3-01	0	77
Tumor	ACC	TCGA-OR-A5LS-01	0	77
Tumor	ACC	TCGA-OR-A5LH-01	0	77
Tumor	ACC	TCGA-OR-A5JL-01	0	77
Tumor	ACC	TCGA-OR-A5JG-01	0	77
Tumor	ACC	TCGA-OR-A5LO-01	0	77
Tumor	ACC	TCGA-OR-A5L3-01	0	77
Tumor	ACC	TCGA-OR-A5LC-01	0	77
Tumor	ACC	TCGA-P6-A5OF-01	0	77
Tumor	ACC	TCGA-OR-A5KX-01	0	77
Tumor	ACC	TCGA-OR-A5K4-01	0	77
Tumor	ACC	TCGA-OR-A5J1-01	0	77
Tumor	ACC	TCGA-OR-A5JT-01	0	77
Tumor	ACC	TCGA-OR-A5JB-01	0	77
Tumor	ACC	TCGA-OR-A5JY-01	0	77
Tumor	ACC	TCGA-OR-A5JR-01	0	77
Tumor	ACC	TCGA-OR-A5KV-01	0	77
Tumor	ACC	TCGA-OR-A5K6-01	0	77
Tumor	ACC	TCGA-OR-A5JS-01	0	77
Tumor	ACC	TCGA-OR-A5LP-01	0	77
Tumor	ACC	TCGA-OR-A5LK-01	0	77
Tumor	ACC	TCGA-OR-A5JK-01	0	77
Tumor	ACC	TCGA-OR-A5JD-01	0	77
Tumor	ACC	TCGA-OR-A5L4-01	0	77
Tumor	ACC	TCGA-OR-A5KT-01	0	77
Tumor	ACC	TCGA-PK-A5H9-01	0	77
Tumor	ACC	TCGA-OR-A5K0-01	0	77
Tumor	BLCA	TCGA-MV-A51V-01	19	407
Tumor	BLCA	TCGA-FD-A3SR-01	19	407
Tumor	BLCA	TCGA-DK-A6B0-01	19	407
Tumor	BLCA	TCGA-FD-A5BS-01	19	407
Tumor	BLCA	TCGA-DK-A1AD-01	19	407
Tumor	BLCA	TCGA-XF-AAMQ-01	19	407
Tumor	BLCA	TCGA-FT-A3EE-01	19	407
Tumor	BLCA	TCGA-ZF-AA4T-01	19	407
Tumor	BLCA	TCGA-E7-A3X6-01	19	407
Tumor	BLCA	TCGA-GU-A762-01	19	407
Tumor	BLCA	TCGA-FD-A43S-01	19	407
Tumor	BLCA	TCGA-XF-A8HE-01	19	407
Tumor	BLCA	TCGA-BT-A42F-01	19	407
Tumor	BLCA	TCGA-G2-A3IB-01	19	407
Tumor	BLCA	TCGA-CU-A3KJ-01	19	407
Tumor	BLCA	TCGA-DK-A3IS-01	19	407
Tumor	BLCA	TCGA-E5-A4U1-01	19	407
Tumor	BLCA	TCGA-XF-A8HF-01	19	407
Tumor	BLCA	TCGA-KQ-A41P-01	19	407
Tumor	BLCA	TCGA-BL-A13I-01	19	407
Tumor	BLCA	TCGA-ZF-AA4W-01	19	407
Tumor	BLCA	TCGA-UY-A9PA-01	19	407
Normal	BLCA	TCGA-BT-A20N-11	19	407
Tumor	BLCA	TCGA-E5-A2PC-01	19	407
Tumor	BLCA	TCGA-UY-A9PE-01	19	407
Tumor	BLCA	TCGA-XF-A9SV-01	19	407
Tumor	BLCA	TCGA-E7-A6MF-01	19	407
Tumor	BLCA	TCGA-ZF-AA56-01	19	407
Tumor	BLCA	TCGA-DK-AA6X-01	19	407
Tumor	BLCA	TCGA-ZF-A9R9-01	19	407
Tumor	BLCA	TCGA-DK-AA6S-01	19	407
Tumor	BLCA	TCGA-KQ-A41S-01	19	407
Tumor	BLCA	TCGA-YF-AA3M-01	19	407
Tumor	BLCA	TCGA-CF-A7I0-01	19	407
Tumor	BLCA	TCGA-XF-A9T8-01	19	407
Tumor	BLCA	TCGA-CU-A0YR-01	19	407
Tumor	BLCA	TCGA-GC-A3YS-01	19	407
Normal	BLCA	TCGA-K4-A54R-11	19	407
Tumor	BLCA	TCGA-ZF-AA4N-01	19	407
Tumor	BLCA	TCGA-XF-AAMG-01	19	407
Tumor	BLCA	TCGA-GC-A3RC-01	19	407
Tumor	BLCA	TCGA-CF-A8HY-01	19	407
Tumor	BLCA	TCGA-ZF-A9RL-01	19	407
Tumor	BLCA	TCGA-XF-A9T0-01	19	407
Tumor	BLCA	TCGA-UY-A78M-01	19	407
Tumor	BLCA	TCGA-GC-A4ZW-01	19	407
Tumor	BLCA	TCGA-K4-A4AC-01	19	407
Tumor	BLCA	TCGA-G2-A2ES-01	19	407
Tumor	BLCA	TCGA-FJ-A871-01	19	407
Tumor	BLCA	TCGA-GD-A3OP-01	19	407
Tumor	BLCA	TCGA-FD-A3SL-01	19	407
Tumor	BLCA	TCGA-XF-A9T3-01	19	407
Tumor	BLCA	TCGA-ZF-AA4V-01	19	407
Normal	BLCA	TCGA-GC-A3BM-11	19	407
Normal	BLCA	TCGA-K4-A5RI-11	19	407
Tumor	BLCA	TCGA-XF-AAMW-01	19	407
Tumor	BLCA	TCGA-G2-A2EO-01	19	407
Tumor	BLCA	TCGA-XF-A8HH-01	19	407
Tumor	BLCA	TCGA-FD-A3B7-01	19	407
Tumor	BLCA	TCGA-K4-A3WU-01	19	407
Tumor	BLCA	TCGA-CF-A47V-01	19	407
Tumor	BLCA	TCGA-DK-A3X1-01	19	407
Tumor	BLCA	TCGA-4Z-AA81-01	19	407
Tumor	BLCA	TCGA-CF-A3MG-01	19	407
Tumor	BLCA	TCGA-S5-AA26-01	19	407
Tumor	BLCA	TCGA-ZF-A9R4-01	19	407
Tumor	BLCA	TCGA-GC-A3OO-01	19	407
Tumor	BLCA	TCGA-YC-A9TC-01	19	407
Tumor	BLCA	TCGA-YF-AA3L-01	19	407
Tumor	BLCA	TCGA-XF-A9SJ-01	19	407
Tumor	BLCA	TCGA-ZF-A9R0-01	19	407
Tumor	BLCA	TCGA-BT-A42C-01	19	407
Tumor	BLCA	TCGA-GU-A42P-01	19	407
Tumor	BLCA	TCGA-2F-A9KP-01	19	407
Tumor	BLCA	TCGA-CU-A3QU-01	19	407
Tumor	BLCA	TCGA-DK-AA6Q-01	19	407
Tumor	BLCA	TCGA-BT-A20P-01	19	407
Tumor	BLCA	TCGA-ZF-A9RN-01	19	407
Tumor	BLCA	TCGA-GV-A3QI-01	19	407
Tumor	BLCA	TCGA-FD-A5BU-01	19	407
Tumor	BLCA	TCGA-FD-A3NA-01	19	407
Tumor	BLCA	TCGA-DK-AA76-01	19	407
Tumor	BLCA	TCGA-DK-A1AA-01	19	407
Normal	BLCA	TCGA-CU-A0YR-11	19	407
Tumor	BLCA	TCGA-FD-A3B3-01	19	407
Tumor	BLCA	TCGA-FD-A6TF-01	19	407
Tumor	BLCA	TCGA-BT-A20W-01	19	407
Tumor	BLCA	TCGA-GU-A767-01	19	407
Tumor	BLCA	TCGA-DK-A6B2-01	19	407
Tumor	BLCA	TCGA-XF-A9T5-01	19	407
Tumor	BLCA	TCGA-GC-A3RB-01	19	407
Tumor	BLCA	TCGA-XF-AAME-01	19	407
Tumor	BLCA	TCGA-FD-A6TE-01	19	407
Tumor	BLCA	TCGA-BT-A20O-01	19	407
Tumor	BLCA	TCGA-E7-A6ME-01	19	407
Tumor	BLCA	TCGA-XF-AAMJ-01	19	407
Tumor	BLCA	TCGA-CF-A1HR-01	19	407
Tumor	BLCA	TCGA-CF-A9FL-01	19	407
Tumor	BLCA	TCGA-H4-A2HO-01	19	407
Tumor	BLCA	TCGA-FJ-A3Z7-01	19	407
Normal	BLCA	TCGA-BL-A13J-11	19	407
Tumor	BLCA	TCGA-DK-AA6L-01	19	407
Tumor	BLCA	TCGA-BT-A3PJ-01	19	407
Tumor	BLCA	TCGA-K4-A5RH-01	19	407
Tumor	BLCA	TCGA-BT-A0YX-01	19	407
Tumor	BLCA	TCGA-XF-A9SK-01	19	407
Tumor	BLCA	TCGA-UY-A9PH-01	19	407
Tumor	BLCA	TCGA-ZF-A9RC-01	19	407
Tumor	BLCA	TCGA-DK-AA74-01	19	407
Tumor	BLCA	TCGA-XF-A9SX-01	19	407
Tumor	BLCA	TCGA-XF-AAN1-01	19	407
Tumor	BLCA	TCGA-FD-A43X-01	19	407
Tumor	BLCA	TCGA-K4-A3WS-01	19	407
Tumor	BLCA	TCGA-G2-AA3D-01	19	407
Tumor	BLCA	TCGA-GU-AATQ-01	19	407
Tumor	BLCA	TCGA-GD-A3OQ-01	19	407
Tumor	BLCA	TCGA-DK-A3WW-01	19	407
Tumor	BLCA	TCGA-PQ-A6FI-01	19	407
Tumor	BLCA	TCGA-BL-A5ZZ-01	19	407
Tumor	BLCA	TCGA-E7-A5KE-01	19	407
Tumor	BLCA	TCGA-FD-A3SQ-01	19	407
Tumor	BLCA	TCGA-DK-A1AG-01	19	407
Tumor	BLCA	TCGA-DK-A3IT-01	19	407
Normal	BLCA	TCGA-BT-A20R-11	19	407
Tumor	BLCA	TCGA-XF-AAMR-01	19	407
Tumor	BLCA	TCGA-HQ-A5NE-01	19	407
Tumor	BLCA	TCGA-ZF-AA52-01	19	407
Tumor	BLCA	TCGA-E7-A541-01	19	407
Tumor	BLCA	TCGA-UY-A8OB-01	19	407
Tumor	BLCA	TCGA-XF-AAN5-01	19	407
Tumor	BLCA	TCGA-E7-A97P-01	19	407
Tumor	BLCA	TCGA-GC-A3RD-01	19	407
Tumor	BLCA	TCGA-E7-A7XN-01	19	407
Tumor	BLCA	TCGA-GV-A3JX-01	19	407
Tumor	BLCA	TCGA-4Z-AA83-01	19	407
Tumor	BLCA	TCGA-ZF-AA5N-01	19	407
Tumor	BLCA	TCGA-H4-A2HQ-01	19	407
Tumor	BLCA	TCGA-G2-A2EF-01	19	407
Tumor	BLCA	TCGA-UY-A9PF-01	19	407
Tumor	BLCA	TCGA-XF-A9SU-01	19	407
Tumor	BLCA	TCGA-DK-A3WY-01	19	407
Tumor	BLCA	TCGA-5N-A9KM-01	19	407
Tumor	BLCA	TCGA-DK-AA6T-01	19	407
Tumor	BLCA	TCGA-E5-A4TZ-01	19	407
Tumor	BLCA	TCGA-FD-A43N-01	19	407
Tumor	BLCA	TCGA-5N-A9KI-01	19	407
Normal	BLCA	TCGA-BT-A20Q-11	19	407
Tumor	BLCA	TCGA-FD-A3SP-01	19	407
Normal	BLCA	TCGA-BT-A20U-11	19	407
Tumor	BLCA	TCGA-XF-AAMH-01	19	407
Tumor	BLCA	TCGA-DK-A2I2-01	19	407
Tumor	BLCA	TCGA-KQ-A41O-01	19	407
Tumor	BLCA	TCGA-DK-A3IM-01	19	407
Tumor	BLCA	TCGA-4Z-AA7Q-01	19	407
Normal	BLCA	TCGA-K4-A3WV-11	19	407
Tumor	BLCA	TCGA-DK-A2I6-01	19	407
Normal	BLCA	TCGA-CU-A0YN-11	19	407
Tumor	BLCA	TCGA-DK-A6B6-01	19	407
Tumor	BLCA	TCGA-CU-A72E-01	19	407
Tumor	BLCA	TCGA-FT-A61P-01	19	407
Tumor	BLCA	TCGA-DK-A3IQ-01	19	407
Tumor	BLCA	TCGA-UY-A78N-01	19	407
Normal	BLCA	TCGA-GC-A6I3-11	19	407
Tumor	BLCA	TCGA-4Z-AA7Y-01	19	407
Tumor	BLCA	TCGA-G2-A2EK-01	19	407
Tumor	BLCA	TCGA-FD-A3SO-01	19	407
Tumor	BLCA	TCGA-GC-A3WC-01	19	407
Tumor	BLCA	TCGA-4Z-AA7M-01	19	407
Tumor	BLCA	TCGA-BL-A3JM-01	19	407
Tumor	BLCA	TCGA-ZF-AA4U-01	19	407
Tumor	BLCA	TCGA-ZF-AA53-01	19	407
Tumor	BLCA	TCGA-CF-A9FF-01	19	407
Tumor	BLCA	TCGA-DK-A3IV-01	19	407
Normal	BLCA	TCGA-BT-A2LA-11	19	407
Tumor	BLCA	TCGA-FJ-A3Z9-01	19	407
Tumor	BLCA	TCGA-XF-AAMT-01	19	407
Tumor	BLCA	TCGA-XF-AAN4-01	19	407
Tumor	BLCA	TCGA-XF-A8HB-01	19	407
Tumor	BLCA	TCGA-BT-A0S7-01	19	407
Tumor	BLCA	TCGA-FD-A5C1-01	19	407
Tumor	BLCA	TCGA-FD-A3B4-01	19	407
Tumor	BLCA	TCGA-FD-A3N5-01	19	407
Tumor	BLCA	TCGA-4Z-AA86-01	19	407
Tumor	BLCA	TCGA-4Z-AA7O-01	19	407
Tumor	BLCA	TCGA-BT-A2LB-01	19	407
Tumor	BLCA	TCGA-GV-A3QF-01	19	407
Tumor	BLCA	TCGA-E7-A7DV-01	19	407
Tumor	BLCA	TCGA-XF-A9SI-01	19	407
Tumor	BLCA	TCGA-C4-A0F7-01	19	407
Tumor	BLCA	TCGA-DK-A6AW-01	19	407
Tumor	BLCA	TCGA-DK-AA75-01	19	407
Tumor	BLCA	TCGA-FD-A62O-01	19	407
Tumor	BLCA	TCGA-LT-A5Z6-01	19	407
Tumor	BLCA	TCGA-FD-A3B8-01	19	407
Tumor	BLCA	TCGA-FJ-A3ZE-01	19	407
Tumor	BLCA	TCGA-ZF-A9RM-01	19	407
Tumor	BLCA	TCGA-UY-A78L-01	19	407
Tumor	BLCA	TCGA-DK-A2I1-01	19	407
Tumor	BLCA	TCGA-FD-A62S-01	19	407
Tumor	BLCA	TCGA-XF-AAMZ-01	19	407
Tumor	BLCA	TCGA-FD-A3SM-01	19	407
Tumor	BLCA	TCGA-E7-A85H-01	19	407
Tumor	BLCA	TCGA-E7-A678-01	19	407
Tumor	BLCA	TCGA-BT-A20X-01	19	407
Tumor	BLCA	TCGA-CF-A9FH-01	19	407
Tumor	BLCA	TCGA-FD-A3N6-01	19	407
Tumor	BLCA	TCGA-CF-A47T-01	19	407
Tumor	BLCA	TCGA-4Z-AA7W-01	19	407
Tumor	BLCA	TCGA-C4-A0F6-01	19	407
Tumor	BLCA	TCGA-4Z-AA7S-01	19	407
Tumor	BLCA	TCGA-UY-A78K-01	19	407
Tumor	BLCA	TCGA-4Z-AA87-01	19	407
Tumor	BLCA	TCGA-DK-A3IN-01	19	407
Tumor	BLCA	TCGA-CU-A0YO-01	19	407
Tumor	BLCA	TCGA-ZF-A9R5-01	19	407
Tumor	BLCA	TCGA-ZF-A9R1-01	19	407
Tumor	BLCA	TCGA-CF-A47S-01	19	407
Tumor	BLCA	TCGA-FD-A62N-01	19	407
Tumor	BLCA	TCGA-YC-A89H-01	19	407
Tumor	BLCA	TCGA-GU-A42R-01	19	407
Tumor	BLCA	TCGA-CF-A47X-01	19	407
Tumor	BLCA	TCGA-2F-A9KQ-01	19	407
Tumor	BLCA	TCGA-DK-A1A7-01	19	407
Tumor	BLCA	TCGA-LT-A8JT-01	19	407
Tumor	BLCA	TCGA-GV-A6ZA-01	19	407
Tumor	BLCA	TCGA-FD-A5BT-01	19	407
Tumor	BLCA	TCGA-GV-A3QH-01	19	407
Tumor	BLCA	TCGA-SY-A9G0-01	19	407
Tumor	BLCA	TCGA-BT-A2LD-01	19	407
Tumor	BLCA	TCGA-DK-A1AC-01	19	407
Tumor	BLCA	TCGA-FD-A6TD-01	19	407
Tumor	BLCA	TCGA-DK-AA77-01	19	407
Tumor	BLCA	TCGA-XF-A8HC-01	19	407
Tumor	BLCA	TCGA-PQ-A6FN-01	19	407
Tumor	BLCA	TCGA-XF-A9SL-01	19	407
Tumor	BLCA	TCGA-GC-A6I1-01	19	407
Tumor	BLCA	TCGA-FD-A5BX-01	19	407
Tumor	BLCA	TCGA-BT-A20V-01	19	407
Tumor	BLCA	TCGA-FD-A6TA-01	19	407
Tumor	BLCA	TCGA-GV-A3JW-01	19	407
Tumor	BLCA	TCGA-CF-A1HS-01	19	407
Tumor	BLCA	TCGA-CU-A5W6-01	19	407
Tumor	BLCA	TCGA-FD-A6TC-01	19	407
Tumor	BLCA	TCGA-GC-A3I6-01	19	407
Tumor	BLCA	TCGA-FD-A6TH-01	19	407
Tumor	BLCA	TCGA-K4-A83P-01	19	407
Tumor	BLCA	TCGA-BT-A20N-01	19	407
Normal	BLCA	TCGA-GD-A3OQ-11	19	407
Tumor	BLCA	TCGA-UY-A9PB-01	19	407
Tumor	BLCA	TCGA-E7-A4IJ-01	19	407
Tumor	BLCA	TCGA-DK-A3IL-01	19	407
Tumor	BLCA	TCGA-ZF-AA51-01	19	407
Tumor	BLCA	TCGA-E7-A7PW-01	19	407
Tumor	BLCA	TCGA-FD-A62P-01	19	407
Tumor	BLCA	TCGA-GV-A40G-01	19	407
Tumor	BLCA	TCGA-GD-A2C5-01	19	407
Tumor	BLCA	TCGA-GU-AATO-01	19	407
Tumor	BLCA	TCGA-BT-A3PK-01	19	407
Tumor	BLCA	TCGA-K4-A54R-01	19	407
Tumor	BLCA	TCGA-DK-A1A6-01	19	407
Tumor	BLCA	TCGA-K4-A5RI-01	19	407
Tumor	BLCA	TCGA-E7-A519-01	19	407
Tumor	BLCA	TCGA-2F-A9KO-01	19	407
Tumor	BLCA	TCGA-XF-A9SZ-01	19	407
Tumor	BLCA	TCGA-DK-A2HX-01	19	407
Tumor	BLCA	TCGA-DK-AA6P-01	19	407
Tumor	BLCA	TCGA-XF-A9SM-01	19	407
Tumor	BLCA	TCGA-S5-A6DX-01	19	407
Tumor	BLCA	TCGA-G2-AA3B-01	19	407
Tumor	BLCA	TCGA-GU-AATP-01	19	407
Tumor	BLCA	TCGA-FD-A43Y-01	19	407
Normal	BLCA	TCGA-GD-A3OP-11	19	407
Tumor	BLCA	TCGA-ZF-A9RE-01	19	407
Tumor	BLCA	TCGA-2F-A9KW-01	19	407
Tumor	BLCA	TCGA-DK-A1AB-01	19	407
Tumor	BLCA	TCGA-CU-A0YN-01	19	407
Tumor	BLCA	TCGA-GC-A3BM-01	19	407
Tumor	BLCA	TCGA-FD-A5BV-01	19	407
Tumor	BLCA	TCGA-FD-A3SS-01	19	407
Tumor	BLCA	TCGA-K4-A6FZ-01	19	407
Tumor	BLCA	TCGA-GD-A76B-01	19	407
Tumor	BLCA	TCGA-DK-AA71-01	19	407
Tumor	BLCA	TCGA-4Z-AA7R-01	19	407
Tumor	BLCA	TCGA-ZF-AA58-01	19	407
Tumor	BLCA	TCGA-K4-A6MB-01	19	407
Tumor	BLCA	TCGA-DK-A6B5-01	19	407
Tumor	BLCA	TCGA-HQ-A5ND-01	19	407
Tumor	BLCA	TCGA-E7-A8O8-01	19	407
Tumor	BLCA	TCGA-UY-A8OD-01	19	407
Tumor	BLCA	TCGA-E7-A8O7-01	19	407
Tumor	BLCA	TCGA-XF-AAMX-01	19	407
Tumor	BLCA	TCGA-XF-AAN0-01	19	407
Tumor	BLCA	TCGA-4Z-AA82-01	19	407
Tumor	BLCA	TCGA-ZF-A9R7-01	19	407
Tumor	BLCA	TCGA-E7-A4XJ-01	19	407
Tumor	BLCA	TCGA-XF-A8HG-01	19	407
Tumor	BLCA	TCGA-XF-A8HD-01	19	407
Tumor	BLCA	TCGA-FJ-A3ZF-01	19	407
Tumor	BLCA	TCGA-UY-A9PD-01	19	407
Tumor	BLCA	TCGA-G2-A2EL-01	19	407
Tumor	BLCA	TCGA-XF-A9SP-01	19	407
Tumor	BLCA	TCGA-DK-AA6U-01	19	407
Tumor	BLCA	TCGA-ZF-AA5H-01	19	407
Tumor	BLCA	TCGA-ZF-AA54-01	19	407
Tumor	BLCA	TCGA-XF-A9ST-01	19	407
Tumor	BLCA	TCGA-KQ-A41R-01	19	407
Tumor	BLCA	TCGA-XF-AAN3-01	19	407
Tumor	BLCA	TCGA-KQ-A41Q-01	19	407
Normal	BLCA	TCGA-BT-A20W-11	19	407
Tumor	BLCA	TCGA-SY-A9G5-01	19	407
Tumor	BLCA	TCGA-4Z-AA89-01	19	407
Tumor	BLCA	TCGA-C4-A0F0-01	19	407
Tumor	BLCA	TCGA-K4-AAQO-01	19	407
Tumor	BLCA	TCGA-E7-A7DU-01	19	407
Tumor	BLCA	TCGA-DK-A1A3-01	19	407
Tumor	BLCA	TCGA-KQ-A41N-01	19	407
Tumor	BLCA	TCGA-XF-A9T6-01	19	407
Tumor	BLCA	TCGA-DK-A2I4-01	19	407
Tumor	BLCA	TCGA-BT-A42E-01	19	407
Tumor	BLCA	TCGA-FD-A43P-01	19	407
Tumor	BLCA	TCGA-FD-A3SJ-01	19	407
Tumor	BLCA	TCGA-HQ-A2OE-01	19	407
Tumor	BLCA	TCGA-UY-A78O-01	19	407
Tumor	BLCA	TCGA-BT-A20T-01	19	407
Tumor	BLCA	TCGA-YC-A8S6-01	19	407
Tumor	BLCA	TCGA-E7-A5KF-01	19	407
Tumor	BLCA	TCGA-BL-A13J-01	19	407
Tumor	BLCA	TCGA-DK-AA6R-01	19	407
Tumor	BLCA	TCGA-G2-A2EJ-01	19	407
Tumor	BLCA	TCGA-FD-A3SN-01	19	407
Tumor	BLCA	TCGA-G2-A3VY-01	19	407
Tumor	BLCA	TCGA-ZF-AA4X-01	19	407
Tumor	BLCA	TCGA-DK-A3IK-01	19	407
Tumor	BLCA	TCGA-XF-AAMY-01	19	407
Tumor	BLCA	TCGA-FD-A5C0-01	19	407
Tumor	BLCA	TCGA-XF-A8HI-01	19	407
Normal	BLCA	TCGA-GD-A2C5-11	19	407
Tumor	BLCA	TCGA-GV-A40E-01	19	407
Tumor	BLCA	TCGA-CF-A47W-01	19	407
Tumor	BLCA	TCGA-XF-AAN2-01	19	407
Tumor	BLCA	TCGA-FD-A3B5-01	19	407
Tumor	BLCA	TCGA-4Z-AA80-01	19	407
Tumor	BLCA	TCGA-CF-A3MF-01	19	407
Tumor	BLCA	TCGA-CF-A3MI-01	19	407
Tumor	BLCA	TCGA-G2-A3IE-01	19	407
Tumor	BLCA	TCGA-4Z-AA84-01	19	407
Tumor	BLCA	TCGA-ZF-A9R2-01	19	407
Tumor	BLCA	TCGA-C4-A0F1-01	19	407
Tumor	BLCA	TCGA-DK-A6AV-01	19	407
Tumor	BLCA	TCGA-XF-A9SH-01	19	407
Tumor	BLCA	TCGA-DK-AA6W-01	19	407
Tumor	BLCA	TCGA-R3-A69X-01	19	407
Tumor	BLCA	TCGA-FD-A3B6-01	19	407
Tumor	BLCA	TCGA-ZF-AA5P-01	19	407
Tumor	BLCA	TCGA-GU-A42Q-01	19	407
Tumor	BLCA	TCGA-HQ-A2OF-01	19	407
Tumor	BLCA	TCGA-2F-A9KR-01	19	407
Tumor	BLCA	TCGA-CF-A5U8-01	19	407
Tumor	BLCA	TCGA-BT-A20R-01	19	407
Tumor	BLCA	TCGA-XF-AAML-01	19	407
Tumor	BLCA	TCGA-GV-A3QK-01	19	407
Tumor	BLCA	TCGA-E7-A6MD-01	19	407
Tumor	BLCA	TCGA-BL-A0C8-01	19	407
Tumor	BLCA	TCGA-FD-A6TG-01	19	407
Tumor	BLCA	TCGA-GU-A766-01	19	407
Tumor	BLCA	TCGA-BT-A20Q-01	19	407
Tumor	BLCA	TCGA-XF-A9T4-01	19	407
Tumor	BLCA	TCGA-GD-A6C6-01	19	407
Tumor	BLCA	TCGA-BT-A20U-01	19	407
Tumor	BLCA	TCGA-FD-A6TK-01	19	407
Tumor	BLCA	TCGA-K4-A3WV-01	19	407
Tumor	BLCA	TCGA-DK-A3X2-01	19	407
Tumor	BLCA	TCGA-CF-A9FM-01	19	407
Tumor	BLCA	TCGA-CU-A3YL-01	19	407
Tumor	BLCA	TCGA-ZF-A9R3-01	19	407
Tumor	BLCA	TCGA-DK-AA6M-01	19	407
Tumor	BLCA	TCGA-CF-A47Y-01	19	407
Tumor	BLCA	TCGA-BT-A3PH-01	19	407
Tumor	BLCA	TCGA-CF-A3MH-01	19	407
Tumor	BLCA	TCGA-CF-A27C-01	19	407
Tumor	BLCA	TCGA-BT-A2LA-01	19	407
Tumor	BLCA	TCGA-G2-AA3F-01	19	407
Tumor	BLCA	TCGA-FD-A5BZ-01	19	407
Tumor	BLCA	TCGA-DK-A1A5-01	19	407
Tumor	BLCA	TCGA-K4-A5RJ-01	19	407
Tumor	BLCA	TCGA-XF-A9SY-01	19	407
Tumor	BLCA	TCGA-CF-A8HX-01	19	407
Tumor	BLCA	TCGA-BT-A20J-01	19	407
Tumor	BLCA	TCGA-DK-A1AF-01	19	407
Tumor	BLCA	TCGA-GU-A764-01	19	407
Tumor	BLCA	TCGA-GC-A6I3-01	19	407
Tumor	BLCA	TCGA-DK-A6B1-01	19	407
Tumor	BLCA	TCGA-FD-A5BY-01	19	407
Tumor	BLCA	TCGA-FD-A43U-01	19	407
Normal	BLCA	TCGA-BT-A2LB-11	19	407
Tumor	BLCA	TCGA-GV-A3JV-01	19	407
Normal	BLCA	TCGA-GC-A3WC-11	19	407
Tumor	BLCA	TCGA-E7-A3Y1-01	19	407
Tumor	BLCA	TCGA-GD-A3OS-01	19	407
Tumor	BLCA	TCGA-E7-A97Q-01	19	407
Tumor	BLCA	TCGA-2F-A9KT-01	19	407
Tumor	BLCA	TCGA-FD-A6TB-01	19	407
Tumor	BLCA	TCGA-CF-A5UA-01	19	407
Tumor	BLCA	TCGA-UY-A8OC-01	19	407
Tumor	BLCA	TCGA-GV-A3QG-01	19	407
Tumor	BLCA	TCGA-FD-A6TI-01	19	407
Tumor	BLCA	TCGA-C4-A0EZ-01	19	407
Tumor	BLCA	TCGA-ZF-A9RF-01	19	407
Tumor	BLCA	TCGA-UY-A78P-01	19	407
Tumor	BLCA	TCGA-ZF-AA4R-01	19	407
Tumor	BLCA	TCGA-DK-A1AE-01	19	407
Tumor	BLCA	TCGA-DK-A3IU-01	19	407
Tumor	BLCA	TCGA-XF-A9T2-01	19	407
Tumor	BLCA	TCGA-GU-A763-01	19	407
Tumor	BLCA	TCGA-XF-AAN8-01	19	407
Tumor	BLCA	TCGA-FD-A5BR-01	19	407
Tumor	BLCA	TCGA-G2-A2EC-01	19	407
Tumor	BLCA	TCGA-LC-A66R-01	19	407
Tumor	BLCA	TCGA-K4-A4AB-01	19	407
Tumor	BLCA	TCGA-XF-AAN7-01	19	407
Tumor	BLCA	TCGA-GV-A3JZ-01	19	407
Tumor	BLCA	TCGA-4Z-AA7N-01	19	407
Tumor	BLCA	TCGA-E7-A677-01	19	407
Tumor	BLCA	TCGA-XF-A9SW-01	19	407
Tumor	BLCA	TCGA-DK-A3WX-01	19	407
Tumor	BLCA	TCGA-G2-AA3C-01	19	407
Tumor	BRCA	TCGA-C8-A1HL-01	113	1092
Tumor	BRCA	TCGA-EW-A2FS-01	113	1092
Normal	BRCA	TCGA-E2-A153-11	113	1092
Tumor	BRCA	TCGA-A2-A3XX-01	113	1092
Normal	BRCA	TCGA-BH-A0BQ-11	113	1092
Tumor	BRCA	TCGA-Z7-A8R5-01	113	1092
Tumor	BRCA	TCGA-B6-A0RL-01	113	1092
Normal	BRCA	TCGA-BH-A204-11	113	1092
Tumor	BRCA	TCGA-E2-A2P6-01	113	1092
Tumor	BRCA	TCGA-AO-A1KT-01	113	1092
Tumor	BRCA	TCGA-E9-A3HO-01	113	1092
Tumor	BRCA	TCGA-D8-A1XJ-01	113	1092
Tumor	BRCA	TCGA-AC-A2FK-01	113	1092
Normal	BRCA	TCGA-E9-A1RF-11	113	1092
Tumor	BRCA	TCGA-E9-A1R4-01	113	1092
Tumor	BRCA	TCGA-LL-A740-01	113	1092
Tumor	BRCA	TCGA-BH-A0BZ-01	113	1092
Tumor	BRCA	TCGA-C8-A3M8-01	113	1092
Tumor	BRCA	TCGA-BH-A0BM-01	113	1092
Tumor	BRCA	TCGA-AN-A0XW-01	113	1092
Tumor	BRCA	TCGA-E2-A1LL-01	113	1092
Tumor	BRCA	TCGA-BH-A18K-01	113	1092
Tumor	BRCA	TCGA-BH-A28O-01	113	1092
Tumor	BRCA	TCGA-A7-A4SC-01	113	1092
Normal	BRCA	TCGA-A7-A13F-11	113	1092
Tumor	BRCA	TCGA-E9-A24A-01	113	1092
Tumor	BRCA	TCGA-AC-A6IV-01	113	1092
Tumor	BRCA	TCGA-B6-A400-01	113	1092
Tumor	BRCA	TCGA-A8-A096-01	113	1092
Tumor	BRCA	TCGA-E2-A1LH-01	113	1092
Tumor	BRCA	TCGA-B6-A0RH-01	113	1092
Tumor	BRCA	TCGA-A8-A07W-01	113	1092
Normal	BRCA	TCGA-AC-A23H-11	113	1092
Normal	BRCA	TCGA-BH-A0HA-11	113	1092
Normal	BRCA	TCGA-A7-A0CE-11	113	1092
Normal	BRCA	TCGA-BH-A0HK-11	113	1092
Tumor	BRCA	TCGA-B6-A0X7-01	113	1092
Tumor	BRCA	TCGA-EW-A1P0-01	113	1092
Tumor	BRCA	TCGA-EW-A1PC-01	113	1092
Tumor	BRCA	TCGA-A7-A0CH-01	113	1092
Tumor	BRCA	TCGA-E9-A2JS-01	113	1092
Tumor	BRCA	TCGA-A2-A1G6-01	113	1092
Tumor	BRCA	TCGA-B6-A0WV-01	113	1092
Tumor	BRCA	TCGA-UL-AAZ6-01	113	1092
Tumor	BRCA	TCGA-B6-A0RG-01	113	1092
Normal	BRCA	TCGA-BH-A0B7-11	113	1092
Tumor	BRCA	TCGA-A7-A0DC-01	113	1092
Tumor	BRCA	TCGA-A2-A0CR-01	113	1092
Tumor	BRCA	TCGA-GM-A2DD-01	113	1092
Tumor	BRCA	TCGA-BH-A6R9-01	113	1092
Normal	BRCA	TCGA-E2-A158-11	113	1092
Tumor	BRCA	TCGA-HN-A2OB-01	113	1092
Tumor	BRCA	TCGA-UU-A93S-01	113	1092
Tumor	BRCA	TCGA-AR-A24P-01	113	1092
Tumor	BRCA	TCGA-E9-A1N9-01	113	1092
Tumor	BRCA	TCGA-B6-A0I9-01	113	1092
Tumor	BRCA	TCGA-E2-A1L9-01	113	1092
Tumor	BRCA	TCGA-AC-A23H-01	113	1092
Tumor	BRCA	TCGA-AR-A1AP-01	113	1092
Tumor	BRCA	TCGA-BH-A0H5-01	113	1092
Tumor	BRCA	TCGA-OK-A5Q2-01	113	1092
Tumor	BRCA	TCGA-BH-A0E6-01	113	1092
Tumor	BRCA	TCGA-D8-A1JA-01	113	1092
Tumor	BRCA	TCGA-BH-A0BW-01	113	1092
Tumor	BRCA	TCGA-B6-A0WZ-01	113	1092
Tumor	BRCA	TCGA-C8-A135-01	113	1092
Tumor	BRCA	TCGA-BH-A0E2-01	113	1092
Tumor	BRCA	TCGA-BH-A0BJ-01	113	1092
Tumor	BRCA	TCGA-BH-A203-01	113	1092
Tumor	BRCA	TCGA-A2-A1G1-01	113	1092
Tumor	BRCA	TCGA-BH-A0C7-01	113	1092
Tumor	BRCA	TCGA-E2-A14X-01	113	1092
Tumor	BRCA	TCGA-BH-A8FZ-01	113	1092
Tumor	BRCA	TCGA-S3-AA17-01	113	1092
Tumor	BRCA	TCGA-AR-A1AR-01	113	1092
Tumor	BRCA	TCGA-D8-A13Z-01	113	1092
Normal	BRCA	TCGA-BH-A0DV-11	113	1092
Tumor	BRCA	TCGA-A7-A6VX-01	113	1092
Tumor	BRCA	TCGA-AR-A255-01	113	1092
Tumor	BRCA	TCGA-AR-A1AT-01	113	1092
Tumor	BRCA	TCGA-A2-A0CU-01	113	1092
Tumor	BRCA	TCGA-BH-A0AZ-01	113	1092
Normal	BRCA	TCGA-BH-A1ET-11	113	1092
Tumor	BRCA	TCGA-E2-A1IH-01	113	1092
Tumor	BRCA	TCGA-BH-A18R-01	113	1092
Tumor	BRCA	TCGA-AC-A4ZE-01	113	1092
Tumor	BRCA	TCGA-B6-A0RS-01	113	1092
Tumor	BRCA	TCGA-AR-A24H-01	113	1092
Tumor	BRCA	TCGA-A8-A099-01	113	1092
Tumor	BRCA	TCGA-A8-A09R-01	113	1092
Tumor	BRCA	TCGA-EW-A6SC-01	113	1092
Tumor	BRCA	TCGA-D8-A1XC-01	113	1092
Tumor	BRCA	TCGA-EW-A1PE-01	113	1092
Tumor	BRCA	TCGA-E2-A1II-01	113	1092
Tumor	BRCA	TCGA-S3-AA14-01	113	1092
Tumor	BRCA	TCGA-A8-A09B-01	113	1092
Tumor	BRCA	TCGA-AR-A5QP-01	113	1092
Tumor	BRCA	TCGA-E9-A6HE-01	113	1092
Tumor	BRCA	TCGA-BH-A0HI-01	113	1092
Normal	BRCA	TCGA-E9-A1ND-11	113	1092
Tumor	BRCA	TCGA-EW-A1P1-01	113	1092
Tumor	BRCA	TCGA-OL-A66P-01	113	1092
Tumor	BRCA	TCGA-A2-A1G4-01	113	1092
Tumor	BRCA	TCGA-E2-A105-01	113	1092
Tumor	BRCA	TCGA-E2-A573-01	113	1092
Tumor	BRCA	TCGA-A2-A0EV-01	113	1092
Normal	BRCA	TCGA-BH-A18M-11	113	1092
Tumor	BRCA	TCGA-A8-A08A-01	113	1092
Tumor	BRCA	TCGA-E9-A1RG-01	113	1092
Tumor	BRCA	TCGA-D8-A1XL-01	113	1092
Normal	BRCA	TCGA-BH-A1EO-11	113	1092
Tumor	BRCA	TCGA-A2-A0ER-01	113	1092
Tumor	BRCA	TCGA-OL-A66K-01	113	1092
Tumor	BRCA	TCGA-EW-A1OX-01	113	1092
Tumor	BRCA	TCGA-S3-AA10-01	113	1092
Tumor	BRCA	TCGA-A8-A0A9-01	113	1092
Tumor	BRCA	TCGA-BH-A1FB-01	113	1092
Tumor	BRCA	TCGA-A2-A04T-01	113	1092
Tumor	BRCA	TCGA-OL-A5S0-01	113	1092
Tumor	BRCA	TCGA-A8-A07J-01	113	1092
Tumor	BRCA	TCGA-E9-A229-01	113	1092
Tumor	BRCA	TCGA-A2-A0SX-01	113	1092
Tumor	BRCA	TCGA-BH-A0AW-01	113	1092
Tumor	BRCA	TCGA-BH-A2L8-01	113	1092
Tumor	BRCA	TCGA-BH-A0B6-01	113	1092
Normal	BRCA	TCGA-AC-A2FB-11	113	1092
Tumor	BRCA	TCGA-AO-A0JL-01	113	1092
Tumor	BRCA	TCGA-BH-A0BS-01	113	1092
Tumor	BRCA	TCGA-B6-A0IG-01	113	1092
Tumor	BRCA	TCGA-OL-A66L-01	113	1092
Tumor	BRCA	TCGA-BH-A0DO-01	113	1092
Tumor	BRCA	TCGA-LL-A73Y-01	113	1092
Tumor	BRCA	TCGA-BH-A0DK-01	113	1092
Tumor	BRCA	TCGA-BH-A0BG-01	113	1092
Tumor	BRCA	TCGA-A8-A06Z-01	113	1092
Normal	BRCA	TCGA-E9-A1RH-11	113	1092
Tumor	BRCA	TCGA-AN-A0AT-01	113	1092
Tumor	BRCA	TCGA-E2-A14U-01	113	1092
Tumor	BRCA	TCGA-AR-A24Q-01	113	1092
Normal	BRCA	TCGA-BH-A0DP-11	113	1092
Tumor	BRCA	TCGA-EW-A1P5-01	113	1092
Tumor	BRCA	TCGA-BH-A1FN-01	113	1092
Tumor	BRCA	TCGA-A7-A4SE-01	113	1092
Tumor	BRCA	TCGA-A1-A0SJ-01	113	1092
Tumor	BRCA	TCGA-E2-A570-01	113	1092
Tumor	BRCA	TCGA-BH-A201-01	113	1092
Normal	BRCA	TCGA-BH-A0H9-11	113	1092
Tumor	BRCA	TCGA-A8-A09E-01	113	1092
Tumor	BRCA	TCGA-D8-A27V-01	113	1092
Tumor	BRCA	TCGA-E2-A14Y-01	113	1092
Tumor	BRCA	TCGA-MS-A51U-01	113	1092
Tumor	BRCA	TCGA-A8-A06Y-01	113	1092
Tumor	BRCA	TCGA-GI-A2C8-01	113	1092
Tumor	BRCA	TCGA-AR-A1AM-01	113	1092
Tumor	BRCA	TCGA-AN-A041-01	113	1092
Tumor	BRCA	TCGA-B6-A409-01	113	1092
Tumor	BRCA	TCGA-BH-A1EX-01	113	1092
Normal	BRCA	TCGA-BH-A0C3-11	113	1092
Tumor	BRCA	TCGA-A7-A0CJ-01	113	1092
Tumor	BRCA	TCGA-BH-A0H0-01	113	1092
Tumor	BRCA	TCGA-LL-A5YO-01	113	1092
Tumor	BRCA	TCGA-AN-A0FW-01	113	1092
Tumor	BRCA	TCGA-AC-A6IX-01	113	1092
Tumor	BRCA	TCGA-A2-A04Y-01	113	1092
Normal	BRCA	TCGA-BH-A1FU-11	113	1092
Tumor	BRCA	TCGA-E2-A156-01	113	1092
Tumor	BRCA	TCGA-AR-A24R-01	113	1092
Tumor	BRCA	TCGA-D8-A1JP-01	113	1092
Tumor	BRCA	TCGA-E2-A1IK-01	113	1092
Tumor	BRCA	TCGA-AN-A0FS-01	113	1092
Tumor	BRCA	TCGA-AC-A3TM-01	113	1092
Tumor	BRCA	TCGA-C8-A12K-01	113	1092
Tumor	BRCA	TCGA-AR-A2LE-01	113	1092
Tumor	BRCA	TCGA-BH-A0HK-01	113	1092
Tumor	BRCA	TCGA-AR-A250-01	113	1092
Tumor	BRCA	TCGA-D8-A1JG-01	113	1092
Tumor	BRCA	TCGA-C8-A134-01	113	1092
Tumor	BRCA	TCGA-AN-A0FX-01	113	1092
Tumor	BRCA	TCGA-AC-A62V-01	113	1092
Tumor	BRCA	TCGA-GM-A3XN-01	113	1092
Tumor	BRCA	TCGA-C8-A275-01	113	1092
Tumor	BRCA	TCGA-AO-A129-01	113	1092
Tumor	BRCA	TCGA-BH-A1F8-01	113	1092
Tumor	BRCA	TCGA-D8-A1JK-01	113	1092
Tumor	BRCA	TCGA-A8-A08X-01	113	1092
Tumor	BRCA	TCGA-AR-A2LN-01	113	1092
Tumor	BRCA	TCGA-A8-A09A-01	113	1092
Tumor	BRCA	TCGA-E2-A1IJ-01	113	1092
Tumor	BRCA	TCGA-A8-A08O-01	113	1092
Tumor	BRCA	TCGA-A2-A4RY-01	113	1092
Tumor	BRCA	TCGA-A2-A0SY-01	113	1092
Tumor	BRCA	TCGA-AC-A8OP-01	113	1092
Tumor	BRCA	TCGA-EW-A1PA-01	113	1092
Tumor	BRCA	TCGA-AO-A126-01	113	1092
Tumor	BRCA	TCGA-AO-A0J6-01	113	1092
Tumor	BRCA	TCGA-EW-A6SB-01	113	1092
Tumor	BRCA	TCGA-EW-A2FV-01	113	1092
Tumor	BRCA	TCGA-AO-A03R-01	113	1092
Tumor	BRCA	TCGA-E9-A54X-01	113	1092
Tumor	BRCA	TCGA-AO-A0JB-01	113	1092
Tumor	BRCA	TCGA-AC-A3W5-01	113	1092
Tumor	BRCA	TCGA-A7-A13G-01	113	1092
Tumor	BRCA	TCGA-AR-A1AS-01	113	1092
Tumor	BRCA	TCGA-C8-A1HJ-01	113	1092
Tumor	BRCA	TCGA-D8-A1Y1-01	113	1092
Tumor	BRCA	TCGA-BH-A0DD-01	113	1092
Tumor	BRCA	TCGA-A2-A0EN-01	113	1092
Tumor	BRCA	TCGA-E9-A1R2-01	113	1092
Normal	BRCA	TCGA-E9-A1N4-11	113	1092
Tumor	BRCA	TCGA-A8-A08L-01	113	1092
Tumor	BRCA	TCGA-A7-A3RF-01	113	1092
Tumor	BRCA	TCGA-A2-A0D4-01	113	1092
Tumor	BRCA	TCGA-EW-A1IW-01	113	1092
Tumor	BRCA	TCGA-AO-A03M-01	113	1092
Tumor	BRCA	TCGA-B6-A0IQ-01	113	1092
Tumor	BRCA	TCGA-BH-A1EW-01	113	1092
Tumor	BRCA	TCGA-BH-A1FG-01	113	1092
Tumor	BRCA	TCGA-AR-A0TS-01	113	1092
Tumor	BRCA	TCGA-A2-A0CM-01	113	1092
Tumor	BRCA	TCGA-A8-A06X-01	113	1092
Normal	BRCA	TCGA-BH-A18S-11	113	1092
Tumor	BRCA	TCGA-D8-A140-01	113	1092
Tumor	BRCA	TCGA-E9-A1R6-01	113	1092
Tumor	BRCA	TCGA-A2-A0CZ-01	113	1092
Tumor	BRCA	TCGA-BH-A1FE-01	113	1092
Tumor	BRCA	TCGA-AN-A0XS-01	113	1092
Tumor	BRCA	TCGA-A2-A04Q-01	113	1092
Tumor	BRCA	TCGA-WT-AB41-01	113	1092
Tumor	BRCA	TCGA-BH-A0BV-01	113	1092
Tumor	BRCA	TCGA-AC-A5XS-01	113	1092
Tumor	BRCA	TCGA-E2-A109-01	113	1092
Normal	BRCA	TCGA-GI-A2C9-11	113	1092
Tumor	BRCA	TCGA-B6-A1KF-01	113	1092
Tumor	BRCA	TCGA-BH-A1FL-01	113	1092
Tumor	BRCA	TCGA-E9-A1NI-01	113	1092
Tumor	BRCA	TCGA-A8-A07R-01	113	1092
Tumor	BRCA	TCGA-AN-A03Y-01	113	1092
Normal	BRCA	TCGA-E2-A1L7-11	113	1092
Tumor	BRCA	TCGA-BH-A0C1-01	113	1092
Tumor	BRCA	TCGA-BH-A1FH-01	113	1092
Tumor	BRCA	TCGA-E2-A572-01	113	1092
Tumor	BRCA	TCGA-A8-A08H-01	113	1092
Tumor	BRCA	TCGA-JL-A3YW-01	113	1092
Tumor	BRCA	TCGA-AN-A0XN-01	113	1092
Tumor	BRCA	TCGA-A1-A0SK-01	113	1092
Tumor	BRCA	TCGA-AO-A125-01	113	1092
Tumor	BRCA	TCGA-PE-A5DC-01	113	1092
Tumor	BRCA	TCGA-E9-A3X8-01	113	1092
Tumor	BRCA	TCGA-BH-A0AU-01	113	1092
Normal	BRCA	TCGA-E9-A1NA-11	113	1092
Tumor	BRCA	TCGA-GM-A2DB-01	113	1092
Tumor	BRCA	TCGA-E9-A244-01	113	1092
Tumor	BRCA	TCGA-A8-A0AB-01	113	1092
Tumor	BRCA	TCGA-A2-A3XV-01	113	1092
Tumor	BRCA	TCGA-AN-A04A-01	113	1092
Tumor	BRCA	TCGA-E2-A14O-01	113	1092
Tumor	BRCA	TCGA-A2-A0T7-01	113	1092
Tumor	BRCA	TCGA-A7-A0D9-01	113	1092
Tumor	BRCA	TCGA-GM-A3XL-01	113	1092
Tumor	BRCA	TCGA-AO-A0JJ-01	113	1092
Tumor	BRCA	TCGA-A2-A0CV-01	113	1092
Normal	BRCA	TCGA-BH-A0E0-11	113	1092
Tumor	BRCA	TCGA-AN-A046-01	113	1092
Tumor	BRCA	TCGA-D8-A1X6-01	113	1092
Tumor	BRCA	TCGA-EW-A3U0-01	113	1092
Tumor	BRCA	TCGA-AO-A0JF-01	113	1092
Tumor	BRCA	TCGA-A2-A0T0-01	113	1092
Tumor	BRCA	TCGA-BH-A0EA-01	113	1092
Tumor	BRCA	TCGA-D8-A147-01	113	1092
Tumor	BRCA	TCGA-E9-A54Y-01	113	1092
Tumor	BRCA	TCGA-LL-A5YN-01	113	1092
Tumor	BRCA	TCGA-C8-A26Y-01	113	1092
Tumor	BRCA	TCGA-AN-A0FJ-01	113	1092
Tumor	BRCA	TCGA-BH-A1EV-01	113	1092
Tumor	BRCA	TCGA-AO-A03V-01	113	1092
Tumor	BRCA	TCGA-B6-A0IK-01	113	1092
Normal	BRCA	TCGA-E9-A1R7-11	113	1092
Tumor	BRCA	TCGA-E2-A15E-01	113	1092
Tumor	BRCA	TCGA-E2-A15D-01	113	1092
Tumor	BRCA	TCGA-E9-A1RB-01	113	1092
Tumor	BRCA	TCGA-AO-A1KR-01	113	1092
Tumor	BRCA	TCGA-BH-A18H-01	113	1092
Tumor	BRCA	TCGA-BH-A0HF-01	113	1092
Tumor	BRCA	TCGA-C8-A12M-01	113	1092
Tumor	BRCA	TCGA-C8-A26V-01	113	1092
Tumor	BRCA	TCGA-B6-A1KN-01	113	1092
Tumor	BRCA	TCGA-A7-A4SA-01	113	1092
Tumor	BRCA	TCGA-E2-A15S-01	113	1092
Tumor	BRCA	TCGA-E9-A1RI-01	113	1092
Tumor	BRCA	TCGA-GM-A2DI-01	113	1092
Tumor	BRCA	TCGA-A8-A09T-01	113	1092
Tumor	BRCA	TCGA-D8-A27T-01	113	1092
Tumor	BRCA	TCGA-C8-A278-01	113	1092
Tumor	BRCA	TCGA-A8-A09C-01	113	1092
Tumor	BRCA	TCGA-BH-A18L-01	113	1092
Tumor	BRCA	TCGA-GM-A2DK-01	113	1092
Tumor	BRCA	TCGA-E9-A22A-01	113	1092
Tumor	BRCA	TCGA-AC-A3YJ-01	113	1092
Tumor	BRCA	TCGA-AR-A2LO-01	113	1092
Normal	BRCA	TCGA-BH-A1FD-11	113	1092
Tumor	BRCA	TCGA-AC-A23C-01	113	1092
Tumor	BRCA	TCGA-D8-A1XM-01	113	1092
Tumor	BRCA	TCGA-BH-A1EU-01	113	1092
Tumor	BRCA	TCGA-PE-A5DD-01	113	1092
Tumor	BRCA	TCGA-WT-AB44-01	113	1092
Tumor	BRCA	TCGA-C8-A8HR-01	113	1092
Tumor	BRCA	TCGA-A2-A0YG-01	113	1092
Tumor	BRCA	TCGA-A8-A09G-01	113	1092
Tumor	BRCA	TCGA-EW-A6SA-01	113	1092
Tumor	BRCA	TCGA-AC-A8OQ-01	113	1092
Tumor	BRCA	TCGA-A1-A0SO-01	113	1092
Tumor	BRCA	TCGA-E2-A10B-01	113	1092
Tumor	BRCA	TCGA-D8-A1XA-01	113	1092
Tumor	BRCA	TCGA-AO-A1KQ-01	113	1092
Tumor	BRCA	TCGA-A8-A0A6-01	113	1092
Tumor	BRCA	TCGA-AQ-A04J-01	113	1092
Tumor	BRCA	TCGA-BH-A0W4-01	113	1092
Normal	BRCA	TCGA-BH-A0DD-11	113	1092
Tumor	BRCA	TCGA-D8-A1X5-01	113	1092
Tumor	BRCA	TCGA-GM-A3XG-01	113	1092
Tumor	BRCA	TCGA-A2-A4RW-01	113	1092
Tumor	BRCA	TCGA-D8-A1XV-01	113	1092
Tumor	BRCA	TCGA-D8-A13Y-01	113	1092
Tumor	BRCA	TCGA-AR-A0TU-01	113	1092
Tumor	BRCA	TCGA-BH-A0B0-01	113	1092
Tumor	BRCA	TCGA-E2-A15P-01	113	1092
Tumor	BRCA	TCGA-D8-A1JN-01	113	1092
Tumor	BRCA	TCGA-BH-A0B8-01	113	1092
Tumor	BRCA	TCGA-E9-A1RD-01	113	1092
Tumor	BRCA	TCGA-AC-A2FG-01	113	1092
Tumor	BRCA	TCGA-A2-A0ET-01	113	1092
Tumor	BRCA	TCGA-E2-A15R-01	113	1092
Tumor	BRCA	TCGA-A2-A3KD-01	113	1092
Tumor	BRCA	TCGA-E9-A1NG-01	113	1092
Tumor	BRCA	TCGA-AC-A6NO-01	113	1092
Tumor	BRCA	TCGA-A8-A08J-01	113	1092
Tumor	BRCA	TCGA-A2-A0CO-01	113	1092
Tumor	BRCA	TCGA-AN-A0FZ-01	113	1092
Tumor	BRCA	TCGA-A2-A0YD-01	113	1092
Tumor	BRCA	TCGA-EW-A1J2-01	113	1092
Tumor	BRCA	TCGA-C8-A12N-01	113	1092
Tumor	BRCA	TCGA-A2-A25F-01	113	1092
Tumor	BRCA	TCGA-A8-A0A1-01	113	1092
Tumor	BRCA	TCGA-D8-A27E-01	113	1092
Tumor	BRCA	TCGA-EW-A1IZ-01	113	1092
Tumor	BRCA	TCGA-B6-A0IB-01	113	1092
Tumor	BRCA	TCGA-A8-A08Z-01	113	1092
Normal	BRCA	TCGA-BH-A208-11	113	1092
Tumor	BRCA	TCGA-AC-A3QQ-01	113	1092
Tumor	BRCA	TCGA-E2-A15T-01	113	1092
Tumor	BRCA	TCGA-BH-A0BC-01	113	1092
Tumor	BRCA	TCGA-AR-A0TV-01	113	1092
Tumor	BRCA	TCGA-E2-A154-01	113	1092
Normal	BRCA	TCGA-BH-A0BA-11	113	1092
Tumor	BRCA	TCGA-GM-A4E0-01	113	1092
Tumor	BRCA	TCGA-AO-A124-01	113	1092
Tumor	BRCA	TCGA-S3-A6ZF-01	113	1092
Tumor	BRCA	TCGA-A8-A09D-01	113	1092
Tumor	BRCA	TCGA-AN-A0XO-01	113	1092
Tumor	BRCA	TCGA-BH-A0DQ-01	113	1092
Tumor	BRCA	TCGA-A2-A4S3-01	113	1092
Tumor	BRCA	TCGA-A2-A0D1-01	113	1092
Tumor	BRCA	TCGA-AO-A0J3-01	113	1092
Tumor	BRCA	TCGA-A2-A0ST-01	113	1092
Tumor	BRCA	TCGA-E9-A1RE-01	113	1092
Tumor	BRCA	TCGA-A2-A25A-01	113	1092
Tumor	BRCA	TCGA-C8-A1HK-01	113	1092
Tumor	BRCA	TCGA-AR-A0TR-01	113	1092
Tumor	BRCA	TCGA-AC-A2B8-01	113	1092
Normal	BRCA	TCGA-E9-A1N6-11	113	1092
Tumor	BRCA	TCGA-E2-A1LG-01	113	1092
Tumor	BRCA	TCGA-A7-A6VW-01	113	1092
Tumor	BRCA	TCGA-AC-A3W7-01	113	1092
Tumor	BRCA	TCGA-E2-A1LK-01	113	1092
Tumor	BRCA	TCGA-B6-A0RT-01	113	1092
Tumor	BRCA	TCGA-BH-A0HB-01	113	1092
Tumor	BRCA	TCGA-C8-A3M7-01	113	1092
Tumor	BRCA	TCGA-D8-A1Y3-01	113	1092
Tumor	BRCA	TCGA-A8-A07C-01	113	1092
Tumor	BRCA	TCGA-A8-A06U-01	113	1092
Tumor	BRCA	TCGA-GI-A2C9-01	113	1092
Normal	BRCA	TCGA-BH-A1F6-11	113	1092
Tumor	BRCA	TCGA-D8-A73W-01	113	1092
Tumor	BRCA	TCGA-E9-A245-01	113	1092
Normal	BRCA	TCGA-A7-A0DB-11	113	1092
Tumor	BRCA	TCGA-B6-A0X0-01	113	1092
Tumor	BRCA	TCGA-A8-A06Q-01	113	1092
Tumor	BRCA	TCGA-E9-A1R0-01	113	1092
Normal	BRCA	TCGA-BH-A1F2-11	113	1092
Tumor	BRCA	TCGA-B6-A0RO-01	113	1092
Tumor	BRCA	TCGA-E9-A1NA-01	113	1092
Tumor	BRCA	TCGA-BH-A0DZ-01	113	1092
Tumor	BRCA	TCGA-AN-A0XP-01	113	1092
Tumor	BRCA	TCGA-EW-A6S9-01	113	1092
Tumor	BRCA	TCGA-AQ-A54O-01	113	1092
Tumor	BRCA	TCGA-BH-A0WA-01	113	1092
Tumor	BRCA	TCGA-BH-AB28-01	113	1092
Tumor	BRCA	TCGA-A8-A09N-01	113	1092
Tumor	BRCA	TCGA-E2-A15A-01	113	1092
Tumor	BRCA	TCGA-E9-A2JT-01	113	1092
Tumor	BRCA	TCGA-BH-A0HQ-01	113	1092
Tumor	BRCA	TCGA-E2-A3DX-01	113	1092
Tumor	BRCA	TCGA-E2-A1L6-01	113	1092
Tumor	BRCA	TCGA-B6-A0I2-01	113	1092
Tumor	BRCA	TCGA-D8-A73X-01	113	1092
Tumor	BRCA	TCGA-A8-A084-01	113	1092
Tumor	BRCA	TCGA-A7-A2KD-01	113	1092
Tumor	BRCA	TCGA-AR-A252-01	113	1092
Tumor	BRCA	TCGA-AR-A24L-01	113	1092
Tumor	BRCA	TCGA-AN-A0XR-01	113	1092
Tumor	BRCA	TCGA-BH-A18V-01	113	1092
Tumor	BRCA	TCGA-B6-A0WY-01	113	1092
Tumor	BRCA	TCGA-EW-A423-01	113	1092
Tumor	BRCA	TCGA-C8-A12X-01	113	1092
Tumor	BRCA	TCGA-E9-A5UO-01	113	1092
Tumor	BRCA	TCGA-BH-A18U-01	113	1092
Tumor	BRCA	TCGA-BH-A0C0-01	113	1092
Tumor	BRCA	TCGA-A8-A09I-01	113	1092
Tumor	BRCA	TCGA-E9-A22D-01	113	1092
Tumor	BRCA	TCGA-E2-A1LE-01	113	1092
Tumor	BRCA	TCGA-E2-A15F-01	113	1092
Tumor	BRCA	TCGA-D8-A27L-01	113	1092
Tumor	BRCA	TCGA-C8-A12O-01	113	1092
Tumor	BRCA	TCGA-D8-A1XG-01	113	1092
Tumor	BRCA	TCGA-C8-A8HQ-01	113	1092
Tumor	BRCA	TCGA-E2-A15M-01	113	1092
Tumor	BRCA	TCGA-A8-A083-01	113	1092
Normal	BRCA	TCGA-E2-A15I-11	113	1092
Tumor	BRCA	TCGA-AC-A3TN-01	113	1092
Tumor	BRCA	TCGA-B6-A0IC-01	113	1092
Tumor	BRCA	TCGA-A2-A0CW-01	113	1092
Tumor	BRCA	TCGA-A8-A092-01	113	1092
Tumor	BRCA	TCGA-D8-A1XS-01	113	1092
Tumor	BRCA	TCGA-BH-A18Q-01	113	1092
Normal	BRCA	TCGA-A7-A13E-11	113	1092
Tumor	BRCA	TCGA-AO-A12B-01	113	1092
Tumor	BRCA	TCGA-AC-A3EH-01	113	1092
Normal	BRCA	TCGA-E2-A1LS-11	113	1092
Tumor	BRCA	TCGA-A7-A26F-01	113	1092
Tumor	BRCA	TCGA-BH-A0B2-01	113	1092
Tumor	BRCA	TCGA-AO-A12F-01	113	1092
Tumor	BRCA	TCGA-EW-A1P6-01	113	1092
Tumor	BRCA	TCGA-GM-A2DF-01	113	1092
Tumor	BRCA	TCGA-A8-A09Q-01	113	1092
Tumor	BRCA	TCGA-AC-A2FF-01	113	1092
Normal	BRCA	TCGA-BH-A0BW-11	113	1092
Tumor	BRCA	TCGA-BH-A18J-01	113	1092
Tumor	BRCA	TCGA-C8-A12W-01	113	1092
Tumor	BRCA	TCGA-A2-A0YJ-01	113	1092
Tumor	BRCA	TCGA-D8-A1XD-01	113	1092
Tumor	BRCA	TCGA-AQ-A1H2-01	113	1092
Tumor	BRCA	TCGA-AR-A24O-01	113	1092
Tumor	BRCA	TCGA-A8-A0AD-01	113	1092
Tumor	BRCA	TCGA-A7-A3J1-01	113	1092
Tumor	BRCA	TCGA-A2-A0EQ-01	113	1092
Tumor	BRCA	TCGA-B6-A402-01	113	1092
Tumor	BRCA	TCGA-LD-A7W6-01	113	1092
Tumor	BRCA	TCGA-BH-A1FR-01	113	1092
Tumor	BRCA	TCGA-A8-A08B-01	113	1092
Tumor	BRCA	TCGA-D8-A1XK-01	113	1092
Tumor	BRCA	TCGA-3C-AAAU-01	113	1092
Tumor	BRCA	TCGA-BH-A0BT-01	113	1092
Tumor	BRCA	TCGA-AO-A03U-01	113	1092
Tumor	BRCA	TCGA-OL-A66H-01	113	1092
Tumor	BRCA	TCGA-AR-A1AJ-01	113	1092
Tumor	BRCA	TCGA-E9-A5UP-01	113	1092
Tumor	BRCA	TCGA-AC-A8OS-01	113	1092
Tumor	BRCA	TCGA-BH-A0DT-01	113	1092
Tumor	BRCA	TCGA-LL-A7SZ-01	113	1092
Tumor	BRCA	TCGA-AN-A0G0-01	113	1092
Tumor	BRCA	TCGA-E2-A14Q-01	113	1092
Tumor	BRCA	TCGA-A2-A1FZ-01	113	1092
Tumor	BRCA	TCGA-OL-A5D6-01	113	1092
Tumor	BRCA	TCGA-BH-A0B9-01	113	1092
Tumor	BRCA	TCGA-AR-A1AQ-01	113	1092
Normal	BRCA	TCGA-BH-A1EW-11	113	1092
Normal	BRCA	TCGA-BH-A0DH-11	113	1092
Tumor	BRCA	TCGA-E9-A226-01	113	1092
Tumor	BRCA	TCGA-E9-A1NF-01	113	1092
Tumor	BRCA	TCGA-BH-A0DL-01	113	1092
Tumor	BRCA	TCGA-A2-A4S1-01	113	1092
Tumor	BRCA	TCGA-E2-A1B0-01	113	1092
Tumor	BRCA	TCGA-C8-A26W-01	113	1092
Normal	BRCA	TCGA-E9-A1RD-11	113	1092
Tumor	BRCA	TCGA-D8-A1JH-01	113	1092
Tumor	BRCA	TCGA-AO-A12D-01	113	1092
Tumor	BRCA	TCGA-AC-A2FM-01	113	1092
Tumor	BRCA	TCGA-E9-A3Q9-01	113	1092
Normal	BRCA	TCGA-BH-A0B5-11	113	1092
Tumor	BRCA	TCGA-AN-A0AL-01	113	1092
Tumor	BRCA	TCGA-B6-A0WW-01	113	1092
Normal	BRCA	TCGA-BH-A18N-11	113	1092
Tumor	BRCA	TCGA-OL-A5RZ-01	113	1092
Tumor	BRCA	TCGA-D8-A1JL-01	113	1092
Tumor	BRCA	TCGA-A7-A0DB-01	113	1092
Tumor	BRCA	TCGA-AR-A1AV-01	113	1092
Tumor	BRCA	TCGA-D8-A1JC-01	113	1092
Normal	BRCA	TCGA-BH-A209-11	113	1092
Tumor	BRCA	TCGA-EW-A1OW-01	113	1092
Tumor	BRCA	TCGA-B6-A2IU-01	113	1092
Tumor	BRCA	TCGA-C8-A137-01	113	1092
Normal	BRCA	TCGA-E2-A1LB-11	113	1092
Tumor	BRCA	TCGA-C8-A1HN-01	113	1092
Tumor	BRCA	TCGA-E2-A1L8-01	113	1092
Tumor	BRCA	TCGA-A7-A26J-01	113	1092
Tumor	BRCA	TCGA-BH-A0E7-01	113	1092
Tumor	BRCA	TCGA-D8-A73U-01	113	1092
Tumor	BRCA	TCGA-D8-A27N-01	113	1092
Tumor	BRCA	TCGA-LL-A8F5-01	113	1092
Tumor	BRCA	TCGA-C8-A8HP-01	113	1092
Tumor	BRCA	TCGA-BH-A6R8-01	113	1092
Normal	BRCA	TCGA-AC-A2FM-11	113	1092
Tumor	BRCA	TCGA-BH-A202-01	113	1092
Tumor	BRCA	TCGA-OL-A5RY-01	113	1092
Tumor	BRCA	TCGA-OL-A66I-01	113	1092
Normal	BRCA	TCGA-E9-A1NF-11	113	1092
Tumor	BRCA	TCGA-C8-A12V-01	113	1092
Tumor	BRCA	TCGA-A7-A26E-01	113	1092
Tumor	BRCA	TCGA-AO-A03N-01	113	1092
Tumor	BRCA	TCGA-BH-A42T-01	113	1092
Tumor	BRCA	TCGA-BH-A0HO-01	113	1092
Tumor	BRCA	TCGA-A8-A09X-01	113	1092
Tumor	BRCA	TCGA-AR-A254-01	113	1092
Tumor	BRCA	TCGA-BH-A0HL-01	113	1092
Normal	BRCA	TCGA-BH-A0AZ-11	113	1092
Tumor	BRCA	TCGA-AC-A3HN-01	113	1092
Tumor	BRCA	TCGA-BH-A0H7-01	113	1092
Tumor	BRCA	TCGA-AC-A6IW-01	113	1092
Tumor	BRCA	TCGA-EW-A1J5-01	113	1092
Tumor	BRCA	TCGA-OL-A6VO-01	113	1092
Tumor	BRCA	TCGA-AC-A23E-01	113	1092
Tumor	BRCA	TCGA-EW-A1J1-01	113	1092
Tumor	BRCA	TCGA-A8-A09W-01	113	1092
Tumor	BRCA	TCGA-B6-A0IM-01	113	1092
Tumor	BRCA	TCGA-BH-A1F0-01	113	1092
Tumor	BRCA	TCGA-EW-A1PD-01	113	1092
Tumor	BRCA	TCGA-D8-A1J8-01	113	1092
Tumor	BRCA	TCGA-B6-A0RV-01	113	1092
Tumor	BRCA	TCGA-AR-A24N-01	113	1092
Tumor	BRCA	TCGA-AQ-A1H3-01	113	1092
Tumor	BRCA	TCGA-C8-A131-01	113	1092
Tumor	BRCA	TCGA-AR-A2LQ-01	113	1092
Tumor	BRCA	TCGA-A2-A0EP-01	113	1092
Tumor	BRCA	TCGA-BH-A0H3-01	113	1092
Tumor	BRCA	TCGA-BH-A1FJ-01	113	1092
Tumor	BRCA	TCGA-B6-A40C-01	113	1092
Tumor	BRCA	TCGA-E2-A1IF-01	113	1092
Tumor	BRCA	TCGA-AO-A0JE-01	113	1092
Tumor	BRCA	TCGA-S3-AA11-01	113	1092
Tumor	BRCA	TCGA-D8-A27I-01	113	1092
Tumor	BRCA	TCGA-AC-A3W6-01	113	1092
Tumor	BRCA	TCGA-AR-A0TX-01	113	1092
Tumor	BRCA	TCGA-AO-A0JG-01	113	1092
Tumor	BRCA	TCGA-A8-A07L-01	113	1092
Tumor	BRCA	TCGA-A2-A0SV-01	113	1092
Tumor	BRCA	TCGA-XX-A899-01	113	1092
Tumor	BRCA	TCGA-A7-A5ZW-01	113	1092
Tumor	BRCA	TCGA-E9-A1NE-01	113	1092
Tumor	BRCA	TCGA-BH-A0BR-01	113	1092
Tumor	BRCA	TCGA-Z7-A8R6-01	113	1092
Tumor	BRCA	TCGA-OL-A5D8-01	113	1092
Tumor	BRCA	TCGA-B6-A0IJ-01	113	1092
Tumor	BRCA	TCGA-OL-A5D7-01	113	1092
Tumor	BRCA	TCGA-A2-A1FW-01	113	1092
Tumor	BRCA	TCGA-A7-A13H-01	113	1092
Tumor	BRCA	TCGA-A2-A0EO-01	113	1092
Tumor	BRCA	TCGA-BH-A0BF-01	113	1092
Tumor	BRCA	TCGA-AR-A5QN-01	113	1092
Tumor	BRCA	TCGA-AQ-A54N-01	113	1092
Tumor	BRCA	TCGA-A2-A04V-01	113	1092
Tumor	BRCA	TCGA-E2-A14T-01	113	1092
Tumor	BRCA	TCGA-E9-A295-01	113	1092
Normal	BRCA	TCGA-E2-A1BC-11	113	1092
Tumor	BRCA	TCGA-EW-A1P4-01	113	1092
Tumor	BRCA	TCGA-A2-A0T4-01	113	1092
Tumor	BRCA	TCGA-BH-A0W3-01	113	1092
Tumor	BRCA	TCGA-BH-A42U-01	113	1092
Tumor	BRCA	TCGA-A8-A08G-01	113	1092
Tumor	BRCA	TCGA-BH-A0BQ-01	113	1092
Tumor	BRCA	TCGA-EW-A1IX-01	113	1092
Tumor	BRCA	TCGA-GM-A5PV-01	113	1092
Tumor	BRCA	TCGA-B6-A401-01	113	1092
Tumor	BRCA	TCGA-C8-A1HG-01	113	1092
Tumor	BRCA	TCGA-E2-A10E-01	113	1092
Tumor	BRCA	TCGA-A7-A0CG-01	113	1092
Tumor	BRCA	TCGA-A2-A0CS-01	113	1092
Tumor	BRCA	TCGA-A1-A0SG-01	113	1092
Tumor	BRCA	TCGA-E2-A1BD-01	113	1092
Tumor	BRCA	TCGA-E2-A14Z-01	113	1092
Tumor	BRCA	TCGA-A2-A04R-01	113	1092
Tumor	BRCA	TCGA-A7-A425-01	113	1092
Tumor	BRCA	TCGA-E9-A1RF-01	113	1092
Tumor	BRCA	TCGA-B6-A408-01	113	1092
Normal	BRCA	TCGA-BH-A0BZ-11	113	1092
Tumor	BRCA	TCGA-AN-A0AM-01	113	1092
Tumor	BRCA	TCGA-D8-A1JU-01	113	1092
Tumor	BRCA	TCGA-AR-A1AH-01	113	1092
Tumor	BRCA	TCGA-BH-A1EN-01	113	1092
Tumor	BRCA	TCGA-E9-A3QA-01	113	1092
Tumor	BRCA	TCGA-BH-A0EB-01	113	1092
Tumor	BRCA	TCGA-BH-A1EY-01	113	1092
Tumor	BRCA	TCGA-E2-A574-01	113	1092
Tumor	BRCA	TCGA-D8-A1JB-01	113	1092
Tumor	BRCA	TCGA-D8-A27P-01	113	1092
Tumor	BRCA	TCGA-E9-A5FL-01	113	1092
Tumor	BRCA	TCGA-LL-A5YM-01	113	1092
Tumor	BRCA	TCGA-BH-A1FC-01	113	1092
Tumor	BRCA	TCGA-XX-A89A-01	113	1092
Tumor	BRCA	TCGA-GM-A2DL-01	113	1092
Normal	BRCA	TCGA-E2-A1LH-11	113	1092
Normal	BRCA	TCGA-BH-A18P-11	113	1092
Tumor	BRCA	TCGA-AO-A12E-01	113	1092
Tumor	BRCA	TCGA-AR-A24S-01	113	1092
Normal	BRCA	TCGA-BH-A0B3-11	113	1092
Tumor	BRCA	TCGA-E2-A15K-01	113	1092
Tumor	BRCA	TCGA-AO-A12G-01	113	1092
Tumor	BRCA	TCGA-BH-A0HA-01	113	1092
Tumor	BRCA	TCGA-W8-A86G-01	113	1092
Tumor	BRCA	TCGA-E2-A153-01	113	1092
Tumor	BRCA	TCGA-AR-A24W-01	113	1092
Tumor	BRCA	TCGA-D8-A1JJ-01	113	1092
Tumor	BRCA	TCGA-AO-A03P-01	113	1092
Tumor	BRCA	TCGA-E2-A158-01	113	1092
Tumor	BRCA	TCGA-A8-A079-01	113	1092
Tumor	BRCA	TCGA-BH-A204-01	113	1092
Tumor	BRCA	TCGA-BH-A0B4-01	113	1092
Tumor	BRCA	TCGA-AO-A03T-01	113	1092
Tumor	BRCA	TCGA-E9-A1N6-01	113	1092
Tumor	BRCA	TCGA-GM-A2DM-01	113	1092
Tumor	BRCA	TCGA-A2-A4RX-01	113	1092
Normal	BRCA	TCGA-E9-A1N9-11	113	1092
Tumor	BRCA	TCGA-D8-A27H-01	113	1092
Tumor	BRCA	TCGA-E9-A1NC-01	113	1092
Tumor	BRCA	TCGA-A2-A3XS-01	113	1092
Tumor	BRCA	TCGA-AR-A0TZ-01	113	1092
Tumor	BRCA	TCGA-AO-A0J7-01	113	1092
Tumor	BRCA	TCGA-D8-A1XY-01	113	1092
Normal	BRCA	TCGA-BH-A0BM-11	113	1092
Tumor	BRCA	TCGA-A2-A0CK-01	113	1092
Tumor	BRCA	TCGA-AC-A8OR-01	113	1092
Normal	BRCA	TCGA-BH-A0E1-11	113	1092
Tumor	BRCA	TCGA-A2-A0YH-01	113	1092
Tumor	BRCA	TCGA-A2-A4S2-01	113	1092
Tumor	BRCA	TCGA-AQ-A7U7-01	113	1092
Tumor	BRCA	TCGA-E2-A10A-01	113	1092
Tumor	BRCA	TCGA-C8-A12P-01	113	1092
Normal	BRCA	TCGA-BH-A0BJ-11	113	1092
Tumor	BRCA	TCGA-GM-A5PX-01	113	1092
Tumor	BRCA	TCGA-A7-A13F-01	113	1092
Tumor	BRCA	TCGA-D8-A1X9-01	113	1092
Tumor	BRCA	TCGA-AR-A1AN-01	113	1092
Tumor	BRCA	TCGA-D8-A1Y0-01	113	1092
Tumor	BRCA	TCGA-EW-A1PG-01	113	1092
Tumor	BRCA	TCGA-AN-A0FN-01	113	1092
Tumor	BRCA	TCGA-EW-A1PF-01	113	1092
Tumor	BRCA	TCGA-AO-A03L-01	113	1092
Tumor	BRCA	TCGA-AN-A0FY-01	113	1092
Tumor	BRCA	TCGA-AC-A7VC-01	113	1092
Tumor	BRCA	TCGA-E9-A1R3-01	113	1092
Tumor	BRCA	TCGA-E2-A1IN-01	113	1092
Tumor	BRCA	TCGA-A2-A25E-01	113	1092
Tumor	BRCA	TCGA-EW-A1IY-01	113	1092
Tumor	BRCA	TCGA-B6-A0X4-01	113	1092
Tumor	BRCA	TCGA-D8-A1XQ-01	113	1092
Tumor	BRCA	TCGA-A2-A0CL-01	113	1092
Normal	BRCA	TCGA-A7-A0CH-11	113	1092
Tumor	BRCA	TCGA-C8-A27A-01	113	1092
Tumor	BRCA	TCGA-E9-A1R7-01	113	1092
Tumor	BRCA	TCGA-E9-A249-01	113	1092
Tumor	BRCA	TCGA-A8-A07P-01	113	1092
Tumor	BRCA	TCGA-BH-A1F5-01	113	1092
Normal	BRCA	TCGA-A7-A0DC-11	113	1092
Tumor	BRCA	TCGA-A8-A08F-01	113	1092
Tumor	BRCA	TCGA-AC-A5XU-01	113	1092
Tumor	BRCA	TCGA-AN-A0XL-01	113	1092
Tumor	BRCA	TCGA-E9-A1ND-01	113	1092
Tumor	BRCA	TCGA-AN-A03X-01	113	1092
Tumor	BRCA	TCGA-A8-A08R-01	113	1092
Tumor	BRCA	TCGA-A2-A0YC-01	113	1092
Tumor	BRCA	TCGA-GM-A2DC-01	113	1092
Tumor	BRCA	TCGA-A2-A3XT-01	113	1092
Tumor	BRCA	TCGA-AN-A04C-01	113	1092
Tumor	BRCA	TCGA-A2-A0YT-01	113	1092
Tumor	BRCA	TCGA-BH-A1EO-01	113	1092
Tumor	BRCA	TCGA-E2-A107-01	113	1092
Normal	BRCA	TCGA-BH-A203-11	113	1092
Tumor	BRCA	TCGA-A2-A04W-01	113	1092
Tumor	BRCA	TCGA-LD-A74U-01	113	1092
Tumor	BRCA	TCGA-B6-A0I5-01	113	1092
Tumor	BRCA	TCGA-BH-A0RX-01	113	1092
Tumor	BRCA	TCGA-BH-A0DV-01	113	1092
Tumor	BRCA	TCGA-GM-A2DO-01	113	1092
Tumor	BRCA	TCGA-A2-A0T1-01	113	1092
Tumor	BRCA	TCGA-BH-A1ET-01	113	1092
Tumor	BRCA	TCGA-BH-A0EI-01	113	1092
Tumor	BRCA	TCGA-E2-A15J-01	113	1092
Normal	BRCA	TCGA-BH-A18R-11	113	1092
Tumor	BRCA	TCGA-A1-A0SQ-01	113	1092
Tumor	BRCA	TCGA-AC-A2QJ-01	113	1092
Tumor	BRCA	TCGA-A7-A26H-01	113	1092
Tumor	BRCA	TCGA-E2-A1IL-01	113	1092
Tumor	BRCA	TCGA-AN-A04D-01	113	1092
Tumor	BRCA	TCGA-C8-A27B-01	113	1092
Tumor	BRCA	TCGA-AN-A0AS-01	113	1092
Tumor	BRCA	TCGA-D8-A4Z1-01	113	1092
Tumor	BRCA	TCGA-A8-A06R-01	113	1092
Tumor	BRCA	TCGA-AO-A1KP-01	113	1092
Tumor	BRCA	TCGA-E9-A1RC-01	113	1092
Tumor	BRCA	TCGA-A2-A04N-01	113	1092
Tumor	BRCA	TCGA-BH-A8FY-01	113	1092
Tumor	BRCA	TCGA-A8-A09V-01	113	1092
Tumor	BRCA	TCGA-GM-A3NY-01	113	1092
Tumor	BRCA	TCGA-BH-A5J0-01	113	1092
Tumor	BRCA	TCGA-B6-A0I6-01	113	1092
Tumor	BRCA	TCGA-AO-A0JI-01	113	1092
Normal	BRCA	TCGA-BH-A1FJ-11	113	1092
Tumor	BRCA	TCGA-BH-A18I-01	113	1092
Tumor	BRCA	TCGA-AO-A0JC-01	113	1092
Tumor	BRCA	TCGA-A8-A09Z-01	113	1092
Tumor	BRCA	TCGA-E9-A1RH-01	113	1092
Tumor	BRCA	TCGA-GM-A2DH-01	113	1092
Tumor	BRCA	TCGA-BH-A1ES-01	113	1092
Tumor	BRCA	TCGA-PL-A8LY-01	113	1092
Tumor	BRCA	TCGA-OL-A5RW-01	113	1092
Tumor	BRCA	TCGA-BH-A18M-01	113	1092
Tumor	BRCA	TCGA-E2-A14R-01	113	1092
Tumor	BRCA	TCGA-A8-A09M-01	113	1092
Tumor	BRCA	TCGA-A1-A0SN-01	113	1092
Tumor	BRCA	TCGA-BH-A18F-01	113	1092
Tumor	BRCA	TCGA-AR-A2LM-01	113	1092
Tumor	BRCA	TCGA-E2-A10C-01	113	1092
Tumor	BRCA	TCGA-AR-A0TW-01	113	1092
Tumor	BRCA	TCGA-BH-A0W5-01	113	1092
Tumor	BRCA	TCGA-AR-A24K-01	113	1092
Tumor	BRCA	TCGA-BH-A0HY-01	113	1092
Normal	BRCA	TCGA-BH-A1FB-11	113	1092
Tumor	BRCA	TCGA-A2-A0EU-01	113	1092
Tumor	BRCA	TCGA-D8-A1XW-01	113	1092
Tumor	BRCA	TCGA-AN-A0FL-01	113	1092
Tumor	BRCA	TCGA-PL-A8LZ-01	113	1092
Tumor	BRCA	TCGA-LL-A5YP-01	113	1092
Tumor	BRCA	TCGA-AC-A2BK-01	113	1092
Tumor	BRCA	TCGA-AC-A7VB-01	113	1092
Tumor	BRCA	TCGA-E2-A1IG-01	113	1092
Tumor	BRCA	TCGA-AO-A0J2-01	113	1092
Tumor	BRCA	TCGA-BH-A28Q-01	113	1092
Tumor	BRCA	TCGA-AC-A2FB-01	113	1092
Normal	BRCA	TCGA-BH-A0BS-11	113	1092
Tumor	BRCA	TCGA-C8-A12L-01	113	1092
Tumor	BRCA	TCGA-3C-AALK-01	113	1092
Tumor	BRCA	TCGA-E9-A1QZ-01	113	1092
Tumor	BRCA	TCGA-AC-A5EH-01	113	1092
Tumor	BRCA	TCGA-GM-A2D9-01	113	1092
Tumor	BRCA	TCGA-LD-A66U-01	113	1092
Tumor	BRCA	TCGA-AO-A1KO-01	113	1092
Normal	BRCA	TCGA-BH-A0DO-11	113	1092
Tumor	BRCA	TCGA-AR-A0TP-01	113	1092
Normal	BRCA	TCGA-BH-A0DK-11	113	1092
Tumor	BRCA	TCGA-A8-A07I-01	113	1092
Tumor	BRCA	TCGA-A2-A0EY-01	113	1092
Tumor	BRCA	TCGA-LL-A442-01	113	1092
Tumor	BRCA	TCGA-A8-A08I-01	113	1092
Tumor	BRCA	TCGA-A8-A091-01	113	1092
Tumor	BRCA	TCGA-D8-A1XT-01	113	1092
Tumor	BRCA	TCGA-BH-A0DG-01	113	1092
Tumor	BRCA	TCGA-AR-A2LL-01	113	1092
Tumor	BRCA	TCGA-4H-AAAK-01	113	1092
Tumor	BRCA	TCGA-3C-AALI-01	113	1092
Tumor	BRCA	TCGA-A8-A08P-01	113	1092
Tumor	BRCA	TCGA-D8-A1X8-01	113	1092
Tumor	BRCA	TCGA-BH-A0E1-01	113	1092
Tumor	BRCA	TCGA-S3-A6ZG-01	113	1092
Tumor	BRCA	TCGA-AO-A0J5-01	113	1092
Tumor	BRCA	TCGA-A2-A0EM-01	113	1092
Tumor	BRCA	TCGA-A8-A08T-01	113	1092
Tumor	BRCA	TCGA-S3-AA12-01	113	1092
Tumor	BRCA	TCGA-HN-A2NL-01	113	1092
Tumor	BRCA	TCGA-AO-A12A-01	113	1092
Tumor	BRCA	TCGA-A2-A0YM-01	113	1092
Normal	BRCA	TCGA-BH-A1FN-11	113	1092
Tumor	BRCA	TCGA-E2-A9RU-01	113	1092
Tumor	BRCA	TCGA-C8-A130-01	113	1092
Tumor	BRCA	TCGA-E2-A1B4-01	113	1092
Tumor	BRCA	TCGA-LL-A73Z-01	113	1092
Tumor	BRCA	TCGA-C8-A1HI-01	113	1092
Tumor	BRCA	TCGA-LL-A6FR-01	113	1092
Tumor	BRCA	TCGA-PL-A8LV-01	113	1092
Tumor	BRCA	TCGA-A8-A07E-01	113	1092
Tumor	BRCA	TCGA-E9-A247-01	113	1092
Tumor	BRCA	TCGA-A2-A3XZ-01	113	1092
Tumor	BRCA	TCGA-A8-A07F-01	113	1092
Tumor	BRCA	TCGA-B6-A0RN-01	113	1092
Tumor	BRCA	TCGA-LD-A7W5-01	113	1092
Tumor	BRCA	TCGA-BH-A0BL-01	113	1092
Tumor	BRCA	TCGA-AN-A0XV-01	113	1092
Tumor	BRCA	TCGA-A7-A4SB-01	113	1092
Tumor	BRCA	TCGA-AN-A0XU-01	113	1092
Tumor	BRCA	TCGA-A7-A6VV-01	113	1092
Tumor	BRCA	TCGA-E2-A1LI-01	113	1092
Tumor	BRCA	TCGA-B6-A0WS-01	113	1092
Tumor	BRCA	TCGA-C8-A138-01	113	1092
Tumor	BRCA	TCGA-A7-A426-01	113	1092
Tumor	BRCA	TCGA-A7-A56D-01	113	1092
Tumor	BRCA	TCGA-A8-A07B-01	113	1092
Tumor	BRCA	TCGA-A8-A086-01	113	1092
Tumor	BRCA	TCGA-BH-A1FU-01	113	1092
Tumor	BRCA	TCGA-B6-A0RI-01	113	1092
Tumor	BRCA	TCGA-E2-A1B6-01	113	1092
Tumor	BRCA	TCGA-E9-A1N4-01	113	1092
Tumor	BRCA	TCGA-OL-A66O-01	113	1092
Tumor	BRCA	TCGA-A7-A6VY-01	113	1092
Tumor	BRCA	TCGA-GM-A2DA-01	113	1092
Tumor	BRCA	TCGA-B6-A0I1-01	113	1092
Tumor	BRCA	TCGA-D8-A141-01	113	1092
Normal	BRCA	TCGA-BH-A1FG-11	113	1092
Tumor	BRCA	TCGA-BH-A0H9-01	113	1092
Tumor	BRCA	TCGA-BH-A18T-01	113	1092
Tumor	BRCA	TCGA-BH-A0BD-01	113	1092
Tumor	BRCA	TCGA-OL-A5RU-01	113	1092
Tumor	BRCA	TCGA-C8-A12T-01	113	1092
Tumor	BRCA	TCGA-A7-A0DA-01	113	1092
Tumor	BRCA	TCGA-A2-A25C-01	113	1092
Tumor	BRCA	TCGA-E2-A14V-01	113	1092
Normal	BRCA	TCGA-BH-A1F8-11	113	1092
Normal	BRCA	TCGA-BH-A0BV-11	113	1092
Tumor	BRCA	TCGA-BH-A0HP-01	113	1092
Tumor	BRCA	TCGA-B6-A0I8-01	113	1092
Tumor	BRCA	TCGA-E2-A1L7-01	113	1092
Tumor	BRCA	TCGA-E9-A1N8-01	113	1092
Tumor	BRCA	TCGA-A8-A085-01	113	1092
Tumor	BRCA	TCGA-AR-A0U0-01	113	1092
Normal	BRCA	TCGA-BH-A0AU-11	113	1092
Tumor	BRCA	TCGA-A7-A0CE-01	113	1092
Tumor	BRCA	TCGA-C8-A12Y-01	113	1092
Normal	BRCA	TCGA-A7-A13G-11	113	1092
Tumor	BRCA	TCGA-AC-A2BM-01	113	1092
Tumor	BRCA	TCGA-BH-A0E0-01	113	1092
Tumor	BRCA	TCGA-E2-A15G-01	113	1092
Tumor	BRCA	TCGA-D8-A146-01	113	1092
Tumor	BRCA	TCGA-C8-A12U-01	113	1092
Tumor	BRCA	TCGA-B6-A0WT-01	113	1092
Tumor	BRCA	TCGA-D8-A27M-01	113	1092
Tumor	BRCA	TCGA-A8-A081-01	113	1092
Tumor	BRCA	TCGA-AO-A03O-01	113	1092
Normal	BRCA	TCGA-BH-A0H5-11	113	1092
Tumor	BRCA	TCGA-E2-A15L-01	113	1092
Tumor	BRCA	TCGA-E2-A15H-01	113	1092
Normal	BRCA	TCGA-BH-A1EV-11	113	1092
Tumor	BRCA	TCGA-A8-A093-01	113	1092
Tumor	BRCA	TCGA-BH-A18S-01	113	1092
Tumor	BRCA	TCGA-AR-A1AO-01	113	1092
Tumor	BRCA	TCGA-AC-A23G-01	113	1092
Tumor	BRCA	TCGA-AR-A24Z-01	113	1092
Tumor	BRCA	TCGA-D8-A145-01	113	1092
Tumor	BRCA	TCGA-BH-A42V-01	113	1092
Tumor	BRCA	TCGA-D8-A1XB-01	113	1092
Tumor	BRCA	TCGA-A2-A0YL-01	113	1092
Tumor	BRCA	TCGA-A7-A5ZX-01	113	1092
Tumor	BRCA	TCGA-EW-A1P7-01	113	1092
Tumor	BRCA	TCGA-AR-A5QQ-01	113	1092
Tumor	BRCA	TCGA-S3-AA15-01	113	1092
Normal	BRCA	TCGA-BH-A1FH-11	113	1092
Normal	BRCA	TCGA-E9-A1RI-11	113	1092
Tumor	BRCA	TCGA-AR-A24M-01	113	1092
Tumor	BRCA	TCGA-A2-A0EW-01	113	1092
Tumor	BRCA	TCGA-EW-A1J3-01	113	1092
Tumor	BRCA	TCGA-EW-A1P3-01	113	1092
Tumor	BRCA	TCGA-BH-A1FD-01	113	1092
Tumor	BRCA	TCGA-EW-A424-01	113	1092
Tumor	BRCA	TCGA-E2-A2P5-01	113	1092
Tumor	BRCA	TCGA-A2-A259-01	113	1092
Tumor	BRCA	TCGA-E2-A1B1-01	113	1092
Tumor	BRCA	TCGA-A7-A3J0-01	113	1092
Tumor	BRCA	TCGA-AR-A2LR-01	113	1092
Tumor	BRCA	TCGA-A2-A0ES-01	113	1092
Normal	BRCA	TCGA-A7-A0D9-11	113	1092
Tumor	BRCA	TCGA-EW-A1P8-01	113	1092
Tumor	BRCA	TCGA-AR-A0U4-01	113	1092
Tumor	BRCA	TCGA-A8-A08C-01	113	1092
Tumor	BRCA	TCGA-LL-A7T0-01	113	1092
Tumor	BRCA	TCGA-A7-A13D-01	113	1092
Tumor	BRCA	TCGA-EW-A1OZ-01	113	1092
Tumor	BRCA	TCGA-A2-A1FX-01	113	1092
Normal	BRCA	TCGA-BH-A0B8-11	113	1092
Tumor	BRCA	TCGA-E2-A10F-01	113	1092
Tumor	BRCA	TCGA-A7-A4SD-01	113	1092
Tumor	BRCA	TCGA-E2-A1B5-01	113	1092
Tumor	BRCA	TCGA-BH-A0DE-01	113	1092
Tumor	BRCA	TCGA-AO-A0JM-01	113	1092
Tumor	BRCA	TCGA-E2-A14P-01	113	1092
Tumor	BRCA	TCGA-E9-A227-01	113	1092
Tumor	BRCA	TCGA-AR-A2LH-01	113	1092
Tumor	BRCA	TCGA-A8-A07O-01	113	1092
Tumor	BRCA	TCGA-A2-A0D3-01	113	1092
Normal	BRCA	TCGA-E9-A1NG-11	113	1092
Tumor	BRCA	TCGA-AO-A0JA-01	113	1092
Tumor	BRCA	TCGA-A2-A4S0-01	113	1092
Normal	BRCA	TCGA-E9-A1RB-11	113	1092
Tumor	BRCA	TCGA-B6-A0IE-01	113	1092
Tumor	BRCA	TCGA-OL-A66J-01	113	1092
Tumor	BRCA	TCGA-D8-A1JI-01	113	1092
Tumor	BRCA	TCGA-OL-A5RX-01	113	1092
Tumor	BRCA	TCGA-EW-A1OY-01	113	1092
Tumor	BRCA	TCGA-AR-A5QM-01	113	1092
Tumor	BRCA	TCGA-A2-A0CQ-01	113	1092
Tumor	BRCA	TCGA-BH-A0BA-01	113	1092
Normal	BRCA	TCGA-BH-A18L-11	113	1092
Tumor	BRCA	TCGA-D8-A27F-01	113	1092
Tumor	BRCA	TCGA-C8-A26Z-01	113	1092
Normal	BRCA	TCGA-BH-A1EU-11	113	1092
Tumor	BRCA	TCGA-E2-A14S-01	113	1092
Tumor	BRCA	TCGA-A8-A06O-01	113	1092
Tumor	BRCA	TCGA-D8-A1JM-01	113	1092
Tumor	BRCA	TCGA-C8-A1HO-01	113	1092
Tumor	BRCA	TCGA-E9-A228-01	113	1092
Tumor	BRCA	TCGA-E9-A1RA-01	113	1092
Tumor	BRCA	TCGA-V7-A7HQ-01	113	1092
Tumor	BRCA	TCGA-OL-A6VR-01	113	1092
Tumor	BRCA	TCGA-AR-A1AW-01	113	1092
Tumor	BRCA	TCGA-AR-A1AY-01	113	1092
Tumor	BRCA	TCGA-BH-A0H6-01	113	1092
Tumor	BRCA	TCGA-EW-A1OV-01	113	1092
Tumor	BRCA	TCGA-A2-A04U-01	113	1092
Tumor	BRCA	TCGA-D8-A1JF-01	113	1092
Tumor	BRCA	TCGA-OL-A6VQ-01	113	1092
Tumor	BRCA	TCGA-C8-A273-01	113	1092
Tumor	BRCA	TCGA-C8-A132-01	113	1092
Tumor	BRCA	TCGA-BH-A0EE-01	113	1092
Tumor	BRCA	TCGA-B6-A0RQ-01	113	1092
Tumor	BRCA	TCGA-D8-A27W-01	113	1092
Tumor	BRCA	TCGA-AR-A2LJ-01	113	1092
Tumor	BRCA	TCGA-A8-A075-01	113	1092
Tumor	BRCA	TCGA-A1-A0SD-01	113	1092
Tumor	BRCA	TCGA-A2-A3Y0-01	113	1092
Tumor	BRCA	TCGA-EW-A6SD-01	113	1092
Tumor	BRCA	TCGA-E2-A14W-01	113	1092
Tumor	BRCA	TCGA-LQ-A4E4-01	113	1092
Tumor	BRCA	TCGA-AR-A256-01	113	1092
Tumor	BRCA	TCGA-A2-A0T3-01	113	1092
Tumor	BRCA	TCGA-BH-A0HN-01	113	1092
Tumor	BRCA	TCGA-A7-A26G-01	113	1092
Tumor	BRCA	TCGA-AN-A0FV-01	113	1092
Tumor	BRCA	TCGA-A7-A0CD-01	113	1092
Tumor	BRCA	TCGA-BH-A208-01	113	1092
Tumor	BRCA	TCGA-BH-A1F6-01	113	1092
Tumor	BRCA	TCGA-AR-A1AU-01	113	1092
Tumor	BRCA	TCGA-AR-A24X-01	113	1092
Tumor	BRCA	TCGA-B6-A0IO-01	113	1092
Tumor	BRCA	TCGA-E2-A1IE-01	113	1092
Tumor	BRCA	TCGA-AN-A0AJ-01	113	1092
Tumor	BRCA	TCGA-AO-A128-01	113	1092
Tumor	BRCA	TCGA-AR-A24T-01	113	1092
Tumor	BRCA	TCGA-A2-A0CT-01	113	1092
Tumor	BRCA	TCGA-BH-A1F2-01	113	1092
Normal	BRCA	TCGA-BH-A0DZ-11	113	1092
Normal	BRCA	TCGA-E9-A1N5-11	113	1092
Tumor	BRCA	TCGA-D8-A1J9-01	113	1092
Tumor	BRCA	TCGA-E2-A150-01	113	1092
Tumor	BRCA	TCGA-AR-A251-01	113	1092
Tumor	BRCA	TCGA-BH-A0B1-01	113	1092
Tumor	BRCA	TCGA-D8-A1JE-01	113	1092
Tumor	BRCA	TCGA-A2-A0CP-01	113	1092
Tumor	BRCA	TCGA-C8-A274-01	113	1092
Tumor	BRCA	TCGA-BH-A5IZ-01	113	1092
Tumor	BRCA	TCGA-A8-A076-01	113	1092
Tumor	BRCA	TCGA-B6-A40B-01	113	1092
Tumor	BRCA	TCGA-AR-A0U2-01	113	1092
Tumor	BRCA	TCGA-B6-A0IH-01	113	1092
Tumor	BRCA	TCGA-D8-A27K-01	113	1092
Tumor	BRCA	TCGA-E9-A5FK-01	113	1092
Tumor	BRCA	TCGA-EW-A1PB-01	113	1092
Tumor	BRCA	TCGA-BH-A0E9-01	113	1092
Tumor	BRCA	TCGA-A1-A0SE-01	113	1092
Tumor	BRCA	TCGA-E9-A1NH-01	113	1092
Tumor	BRCA	TCGA-EW-A2FW-01	113	1092
Tumor	BRCA	TCGA-AO-A0JD-01	113	1092
Tumor	BRCA	TCGA-A7-A3IY-01	113	1092
Tumor	BRCA	TCGA-AO-A0J8-01	113	1092
Normal	BRCA	TCGA-BH-A0DQ-11	113	1092
Tumor	BRCA	TCGA-A7-A3IZ-01	113	1092
Tumor	BRCA	TCGA-A2-A1G0-01	113	1092
Tumor	BRCA	TCGA-D8-A1XZ-01	113	1092
Tumor	BRCA	TCGA-AR-A0TY-01	113	1092
Tumor	BRCA	TCGA-A2-A0SW-01	113	1092
Normal	BRCA	TCGA-BH-A18U-11	113	1092
Tumor	BRCA	TCGA-OL-A5DA-01	113	1092
Tumor	BRCA	TCGA-A7-A5ZV-01	113	1092
Tumor	BRCA	TCGA-LL-A50Y-01	113	1092
Tumor	BRCA	TCGA-BH-A0BP-01	113	1092
Tumor	BRCA	TCGA-AR-A1AK-01	113	1092
Tumor	BRCA	TCGA-E9-A22G-01	113	1092
Tumor	BRCA	TCGA-AC-A2QH-01	113	1092
Normal	BRCA	TCGA-E2-A15M-11	113	1092
Tumor	BRCA	TCGA-LL-A441-01	113	1092
Tumor	BRCA	TCGA-A8-A0A2-01	113	1092
Tumor	BRCA	TCGA-E2-A576-01	113	1092
Tumor	BRCA	TCGA-B6-A1KC-01	113	1092
Tumor	BRCA	TCGA-OL-A66N-01	113	1092
Tumor	BRCA	TCGA-A2-A1FV-01	113	1092
Tumor	BRCA	TCGA-C8-A1HM-01	113	1092
Tumor	BRCA	TCGA-D8-A1JT-01	113	1092
Tumor	BRCA	TCGA-A2-A04P-01	113	1092
Tumor	BRCA	TCGA-BH-A0GY-01	113	1092
Tumor	BRCA	TCGA-E2-A56Z-01	113	1092
Normal	BRCA	TCGA-BH-A18Q-11	113	1092
Tumor	BRCA	TCGA-A7-A13E-01	113	1092
Tumor	BRCA	TCGA-E2-A1LS-01	113	1092
Tumor	BRCA	TCGA-A2-A0CX-01	113	1092
Tumor	BRCA	TCGA-A8-A07S-01	113	1092
Tumor	BRCA	TCGA-BH-A1FM-01	113	1092
Normal	BRCA	TCGA-AC-A2FF-11	113	1092
Tumor	BRCA	TCGA-A1-A0SM-01	113	1092
Tumor	BRCA	TCGA-AQ-A04H-01	113	1092
Tumor	BRCA	TCGA-LL-A6FP-01	113	1092
Tumor	BRCA	TCGA-A2-A0T5-01	113	1092
Tumor	BRCA	TCGA-A7-A4SF-01	113	1092
Tumor	BRCA	TCGA-A2-A25B-01	113	1092
Tumor	BRCA	TCGA-E2-A1IO-01	113	1092
Tumor	BRCA	TCGA-A2-A3XW-01	113	1092
Normal	BRCA	TCGA-BH-A1FE-11	113	1092
Tumor	BRCA	TCGA-A1-A0SI-01	113	1092
Tumor	BRCA	TCGA-B6-A0RP-01	113	1092
Tumor	BRCA	TCGA-AQ-A04L-01	113	1092
Tumor	BRCA	TCGA-E2-A14N-01	113	1092
Normal	BRCA	TCGA-BH-A18V-11	113	1092
Tumor	BRCA	TCGA-AN-A049-01	113	1092
Tumor	BRCA	TCGA-A1-A0SB-01	113	1092
Tumor	BRCA	TCGA-BH-A0GZ-01	113	1092
Normal	BRCA	TCGA-BH-A0BT-11	113	1092
Normal	BRCA	TCGA-BH-A0C0-11	113	1092
Tumor	BRCA	TCGA-BH-A0DP-01	113	1092
Tumor	BRCA	TCGA-AC-A2QI-01	113	1092
Normal	BRCA	TCGA-BH-A0DT-11	113	1092
Tumor	BRCA	TCGA-5L-AAT1-01	113	1092
Tumor	BRCA	TCGA-A8-A06N-01	113	1092
Tumor	BRCA	TCGA-BH-A8G0-01	113	1092
Tumor	BRCA	TCGA-A2-A0T6-01	113	1092
Tumor	BRCA	TCGA-AN-A0FF-01	113	1092
Tumor	BRCA	TCGA-E2-A15I-01	113	1092
Tumor	BRCA	TCGA-LL-A5YL-01	113	1092
Tumor	BRCA	TCGA-C8-A26X-01	113	1092
Tumor	BRCA	TCGA-AN-A0FD-01	113	1092
Tumor	BRCA	TCGA-AN-A0AK-01	113	1092
Tumor	BRCA	TCGA-D8-A1JS-01	113	1092
Tumor	BRCA	TCGA-AO-A1KS-01	113	1092
Tumor	BRCA	TCGA-AR-A24U-01	113	1092
Tumor	BRCA	TCGA-AR-A1AX-01	113	1092
Normal	BRCA	TCGA-GI-A2C8-11	113	1092
Tumor	BRCA	TCGA-BH-A0C3-01	113	1092
Tumor	BRCA	TCGA-AC-A62Y-01	113	1092
Tumor	BRCA	TCGA-D8-A1JD-01	113	1092
Tumor	BRCA	TCGA-S3-AA0Z-01	113	1092
Normal	BRCA	TCGA-BH-A0DL-11	113	1092
Normal	BRCA	TCGA-BH-A18J-11	113	1092
Tumor	BRCA	TCGA-E9-A1N3-01	113	1092
Tumor	BRCA	TCGA-A2-A0T2-01	113	1092
Tumor	BRCA	TCGA-BH-A0B5-01	113	1092
Tumor	BRCA	TCGA-LL-A9Q3-01	113	1092
Tumor	BRCA	TCGA-BH-A18N-01	113	1092
Tumor	BRCA	TCGA-D8-A27R-01	113	1092
Tumor	BRCA	TCGA-AO-A0J9-01	113	1092
Tumor	BRCA	TCGA-E9-A1N5-01	113	1092
Tumor	BRCA	TCGA-BH-A209-01	113	1092
Tumor	BRCA	TCGA-E2-A1AZ-01	113	1092
Tumor	BRCA	TCGA-AN-A0FK-01	113	1092
Tumor	BRCA	TCGA-A2-A0YI-01	113	1092
Tumor	BRCA	TCGA-D8-A1XO-01	113	1092
Normal	BRCA	TCGA-BH-A1FR-11	113	1092
Tumor	BRCA	TCGA-D8-A27G-01	113	1092
Tumor	BRCA	TCGA-AR-A0TT-01	113	1092
Tumor	BRCA	TCGA-A8-A0A4-01	113	1092
Tumor	BRCA	TCGA-D8-A1X7-01	113	1092
Normal	BRCA	TCGA-BH-A0BC-11	113	1092
Tumor	BRCA	TCGA-AC-A3OD-01	113	1092
Tumor	BRCA	TCGA-E2-A1LA-01	113	1092
Tumor	BRCA	TCGA-A8-A095-01	113	1092
Tumor	BRCA	TCGA-D8-A143-01	113	1092
Tumor	BRCA	TCGA-A2-A0YE-01	113	1092
Tumor	BRCA	TCGA-A2-A0D2-01	113	1092
Tumor	BRCA	TCGA-AC-A3YI-01	113	1092
Tumor	BRCA	TCGA-A8-A07Z-01	113	1092
Tumor	BRCA	TCGA-AN-A0FT-01	113	1092
Tumor	BRCA	TCGA-A2-A0YF-01	113	1092
Tumor	BRCA	TCGA-BH-A0DS-01	113	1092
Tumor	BRCA	TCGA-E9-A1R5-01	113	1092
Tumor	BRCA	TCGA-E9-A243-01	113	1092
Tumor	BRCA	TCGA-A2-A25D-01	113	1092
Tumor	BRCA	TCGA-E2-A159-01	113	1092
Tumor	BRCA	TCGA-A8-A0A7-01	113	1092
Tumor	BRCA	TCGA-B6-A0X5-01	113	1092
Normal	BRCA	TCGA-BH-A18K-11	113	1092
Tumor	BRCA	TCGA-B6-A0RE-01	113	1092
Tumor	BRCA	TCGA-A2-A0CY-01	113	1092
Tumor	BRCA	TCGA-JL-A3YX-01	113	1092
Tumor	BRCA	TCGA-AC-A3QP-01	113	1092
Tumor	BRCA	TCGA-EW-A1PH-01	113	1092
Tumor	BRCA	TCGA-BH-A0DH-01	113	1092
Tumor	BRCA	TCGA-E9-A22H-01	113	1092
Tumor	BRCA	TCGA-D8-A3Z6-01	113	1092
Tumor	BRCA	TCGA-E2-A155-01	113	1092
Normal	BRCA	TCGA-E2-A1IG-11	113	1092
Tumor	BRCA	TCGA-B6-A0X1-01	113	1092
Tumor	BRCA	TCGA-PE-A5DE-01	113	1092
Tumor	BRCA	TCGA-A8-A07U-01	113	1092
Tumor	BRCA	TCGA-A1-A0SP-01	113	1092
Tumor	BRCA	TCGA-S3-A6ZH-01	113	1092
Tumor	BRCA	TCGA-A2-A3XU-01	113	1092
Normal	BRCA	TCGA-BH-A0DG-11	113	1092
Tumor	BRCA	TCGA-A1-A0SH-01	113	1092
Tumor	BRCA	TCGA-E2-A1LB-01	113	1092
Tumor	BRCA	TCGA-BH-A0AV-01	113	1092
Tumor	BRCA	TCGA-A2-A0D0-01	113	1092
Tumor	BRCA	TCGA-A8-A08S-01	113	1092
Tumor	BRCA	TCGA-EW-A2FR-01	113	1092
Tumor	BRCA	TCGA-C8-A133-01	113	1092
Tumor	BRCA	TCGA-A2-A3XY-01	113	1092
Tumor	BRCA	TCGA-EW-A3E8-01	113	1092
Tumor	BRCA	TCGA-A2-A0SU-01	113	1092
Tumor	BRCA	TCGA-C8-A1HE-01	113	1092
Tumor	BRCA	TCGA-B6-A0RM-01	113	1092
Tumor	BRCA	TCGA-AQ-A0Y5-01	113	1092
Normal	BRCA	TCGA-BH-A1FM-11	113	1092
Tumor	BRCA	TCGA-5L-AAT0-01	113	1092
Tumor	BRCA	TCGA-AR-A1AI-01	113	1092
Tumor	BRCA	TCGA-D8-A3Z5-01	113	1092
Tumor	BRCA	TCGA-GM-A2DN-01	113	1092
Tumor	BRCA	TCGA-B6-A1KI-01	113	1092
Normal	BRCA	TCGA-BH-A1FC-11	113	1092
Tumor	BRCA	TCGA-BH-A0BO-01	113	1092
Tumor	BRCA	TCGA-E2-A152-01	113	1092
Tumor	BRCA	TCGA-A8-A06T-01	113	1092
Tumor	BRCA	TCGA-AC-A2FE-01	113	1092
Tumor	BRCA	TCGA-LL-A6FQ-01	113	1092
Tumor	BRCA	TCGA-E9-A248-01	113	1092
Tumor	BRCA	TCGA-A7-A26I-01	113	1092
Tumor	BRCA	TCGA-C8-A12Q-01	113	1092
Tumor	BRCA	TCGA-BH-A0HU-01	113	1092
Normal	BRCA	TCGA-BH-A0H7-11	113	1092
Tumor	BRCA	TCGA-AR-A24V-01	113	1092
Tumor	BRCA	TCGA-B6-A0WX-01	113	1092
Tumor	BRCA	TCGA-D8-A1Y2-01	113	1092
Tumor	BRCA	TCGA-AN-A0AR-01	113	1092
Tumor	BRCA	TCGA-A8-A06P-01	113	1092
Tumor	BRCA	TCGA-AC-A62X-01	113	1092
Tumor	BRCA	TCGA-AC-A2FO-01	113	1092
Normal	BRCA	TCGA-BH-A0AY-11	113	1092
Tumor	BRCA	TCGA-B6-A3ZX-01	113	1092
Normal	BRCA	TCGA-BH-A1F0-11	113	1092
Tumor	BRCA	TCGA-D8-A142-01	113	1092
Tumor	BRCA	TCGA-LD-A9QF-01	113	1092
Tumor	BRCA	TCGA-BH-A0DX-01	113	1092
Tumor	BRCA	TCGA-B6-A0RU-01	113	1092
Tumor	BRCA	TCGA-EW-A1J6-01	113	1092
Tumor	BRCA	TCGA-E9-A22B-01	113	1092
Tumor	BRCA	TCGA-E2-A106-01	113	1092
Tumor	BRCA	TCGA-A1-A0SF-01	113	1092
Tumor	BRCA	TCGA-OL-A5RV-01	113	1092
Tumor	BRCA	TCGA-E2-A1BC-01	113	1092
Tumor	BRCA	TCGA-BH-A0W7-01	113	1092
Tumor	BRCA	TCGA-E2-A15C-01	113	1092
Tumor	BRCA	TCGA-AR-A0U3-01	113	1092
Tumor	BRCA	TCGA-BH-A0HW-01	113	1092
Tumor	BRCA	TCGA-GM-A3NW-01	113	1092
Tumor	BRCA	TCGA-D8-A1XU-01	113	1092
Tumor	BRCA	TCGA-BH-A0B3-01	113	1092
Tumor	BRCA	TCGA-PL-A8LX-01	113	1092
Tumor	BRCA	TCGA-B6-A0IN-01	113	1092
Tumor	BRCA	TCGA-A2-A3KC-01	113	1092
Tumor	BRCA	TCGA-BH-A0HX-01	113	1092
Tumor	BRCA	TCGA-A8-A097-01	113	1092
Tumor	BRCA	TCGA-E9-A22E-01	113	1092
Tumor	BRCA	TCGA-B6-A0IP-01	113	1092
Tumor	BRCA	TCGA-A2-A04X-01	113	1092
Tumor	BRCA	TCGA-E2-A1IU-01	113	1092
Tumor	BRCA	TCGA-AC-A3BB-01	113	1092
Tumor	BRCA	TCGA-A8-A094-01	113	1092
Tumor	BRCA	TCGA-C8-A12Z-01	113	1092
Tumor	BRCA	TCGA-D8-A1XF-01	113	1092
Normal	BRCA	TCGA-BH-A1EN-11	113	1092
Tumor	BRCA	TCGA-A8-A082-01	113	1092
Tumor	BRCA	TCGA-AR-A1AL-01	113	1092
Tumor	BRCA	TCGA-3C-AALJ-01	113	1092
Tumor	BRCA	TCGA-LL-A440-01	113	1092
Tumor	BRCA	TCGA-AR-A2LK-01	113	1092
Tumor	BRCA	TCGA-A8-A07G-01	113	1092
Tumor	BRCA	TCGA-AO-A12H-01	113	1092
Tumor	BRCA	TCGA-BH-A0DI-01	113	1092
Tumor	BRCA	TCGA-BH-A0B7-01	113	1092
Normal	BRCA	TCGA-E9-A1RC-11	113	1092
Tumor	BRCA	TCGA-A2-A0EX-01	113	1092
Tumor	BRCA	TCGA-D8-A1XR-01	113	1092
Tumor	BRCA	TCGA-AR-A0TQ-01	113	1092
Tumor	BRCA	TCGA-BH-A18P-01	113	1092
Tumor	BRCA	TCGA-E2-A15O-01	113	1092
Tumor	BRCA	TCGA-AO-A12C-01	113	1092
Tumor	BRCA	TCGA-OL-A97C-01	113	1092
Normal	BRCA	TCGA-E2-A15K-11	113	1092
Tumor	BRCA	TCGA-BH-A18G-01	113	1092
Tumor	BRCA	TCGA-B6-A0IA-01	113	1092
Tumor	BRCA	TCGA-A8-A090-01	113	1092
Tumor	BRCA	TCGA-5T-A9QA-01	113	1092
Tumor	BRCA	TCGA-AN-A0XT-01	113	1092
Tumor	BRCA	TCGA-AO-A0J4-01	113	1092
Tumor	BRCA	TCGA-A2-A0YK-01	113	1092
Tumor	BRCA	TCGA-A8-A09K-01	113	1092
Tumor	CHOL	TCGA-ZH-A8Y5-01	9	36
Tumor	CHOL	TCGA-4G-AAZT-01	9	36
Normal	CHOL	TCGA-W5-AA2R-11	9	36
Tumor	CHOL	TCGA-W5-AA2I-01	9	36
Tumor	CHOL	TCGA-W5-AA34-01	9	36
Tumor	CHOL	TCGA-W5-AA2X-01	9	36
Tumor	CHOL	TCGA-W5-AA2H-01	9	36
Tumor	CHOL	TCGA-3X-AAVB-01	9	36
Tumor	CHOL	TCGA-3X-AAVA-01	9	36
Tumor	CHOL	TCGA-ZH-A8Y4-01	9	36
Normal	CHOL	TCGA-W5-AA31-11	9	36
Tumor	CHOL	TCGA-W5-AA2U-01	9	36
Tumor	CHOL	TCGA-W5-AA2Q-01	9	36
Tumor	CHOL	TCGA-ZH-A8Y2-01	9	36
Tumor	CHOL	TCGA-W5-AA30-01	9	36
Tumor	CHOL	TCGA-WD-A7RX-01	9	36
Normal	CHOL	TCGA-ZU-A8S4-11	9	36
Normal	CHOL	TCGA-W5-AA2U-11	9	36
Tumor	CHOL	TCGA-3X-AAVE-01	9	36
Tumor	CHOL	TCGA-W5-AA2G-01	9	36
Tumor	CHOL	TCGA-W5-AA39-01	9	36
Tumor	CHOL	TCGA-4G-AAZO-01	9	36
Tumor	CHOL	TCGA-W5-AA2R-01	9	36
Normal	CHOL	TCGA-W5-AA34-11	9	36
Normal	CHOL	TCGA-W5-AA2I-11	9	36
Tumor	CHOL	TCGA-W6-AA0S-01	9	36
Tumor	CHOL	TCGA-W5-AA2W-01	9	36
Tumor	CHOL	TCGA-YR-A95A-01	9	36
Tumor	CHOL	TCGA-W5-AA33-01	9	36
Tumor	CHOL	TCGA-ZD-A8I3-01	9	36
Tumor	CHOL	TCGA-W5-AA2O-01	9	36
Tumor	CHOL	TCGA-W5-AA31-01	9	36
Normal	CHOL	TCGA-W5-AA2Q-11	9	36
Tumor	CHOL	TCGA-W5-AA36-01	9	36
Tumor	CHOL	TCGA-W5-AA38-01	9	36
Tumor	CHOL	TCGA-ZU-A8S4-01	9	36
Tumor	CHOL	TCGA-W5-AA2Z-01	9	36
Tumor	CHOL	TCGA-3X-AAVC-01	9	36
Normal	CHOL	TCGA-W5-AA30-11	9	36
Tumor	CHOL	TCGA-ZH-A8Y1-01	9	36
Tumor	CHOL	TCGA-3X-AAV9-01	9	36
Tumor	CHOL	TCGA-W5-AA2T-01	9	36
Tumor	CHOL	TCGA-ZH-A8Y6-01	9	36
Tumor	CHOL	TCGA-ZH-A8Y8-01	9	36
Normal	CHOL	TCGA-W5-AA2X-11	9	36
Tumor	COAD	TCGA-F4-6854-01	41	288
Tumor	COAD	TCGA-D5-5538-01	41	288
Tumor	COAD	TCGA-AA-3511-01	41	288
Tumor	COAD	TCGA-QG-A5YX-01	41	288
Tumor	COAD	TCGA-G4-6320-01	41	288
Tumor	COAD	TCGA-CM-6164-01	41	288
Tumor	COAD	TCGA-A6-A567-01	41	288
Normal	COAD	TCGA-AA-3516-11	41	288
Tumor	COAD	TCGA-DM-A0X9-01	41	288
Tumor	COAD	TCGA-AY-A69D-01	41	288
Tumor	COAD	TCGA-AY-A8YK-01	41	288
Tumor	COAD	TCGA-5M-AAT4-01	41	288
Tumor	COAD	TCGA-CM-6167-01	41	288
Tumor	COAD	TCGA-CM-6168-01	41	288
Tumor	COAD	TCGA-AA-3697-01	41	288
Tumor	COAD	TCGA-AZ-4615-01	41	288
Tumor	COAD	TCGA-AZ-6598-01	41	288
Tumor	COAD	TCGA-A6-6653-01	41	288
Tumor	COAD	TCGA-NH-A50V-01	41	288
Tumor	COAD	TCGA-AD-6899-01	41	288
Normal	COAD	TCGA-A6-2686-11	41	288
Tumor	COAD	TCGA-G4-6311-01	41	288
Normal	COAD	TCGA-A6-2682-11	41	288
Tumor	COAD	TCGA-NH-A6GC-01	41	288
Tumor	COAD	TCGA-F4-6570-01	41	288
Normal	COAD	TCGA-A6-2684-11	41	288
Tumor	COAD	TCGA-G4-6627-01	41	288
Tumor	COAD	TCGA-CM-6679-01	41	288
Tumor	COAD	TCGA-A6-4105-01	41	288
Tumor	COAD	TCGA-D5-6924-01	41	288
Tumor	COAD	TCGA-AD-6965-01	41	288
Tumor	COAD	TCGA-D5-6931-01	41	288
Tumor	COAD	TCGA-A6-5656-01	41	288
Tumor	COAD	TCGA-DM-A1DA-01	41	288
Normal	COAD	TCGA-AA-3518-11	41	288
Tumor	COAD	TCGA-F4-6461-01	41	288
Tumor	COAD	TCGA-F4-6703-01	41	288
Tumor	COAD	TCGA-AA-3492-01	41	288
Tumor	COAD	TCGA-G4-6293-01	41	288
Normal	COAD	TCGA-AA-3531-11	41	288
Tumor	COAD	TCGA-AA-3496-01	41	288
Tumor	COAD	TCGA-G4-6625-01	41	288
Tumor	COAD	TCGA-DM-A28E-01	41	288
Tumor	COAD	TCGA-CK-6747-01	41	288
Tumor	COAD	TCGA-CA-5255-01	41	288
Tumor	COAD	TCGA-CK-4947-01	41	288
Tumor	COAD	TCGA-AD-6888-01	41	288
Tumor	COAD	TCGA-F4-6809-01	41	288
Tumor	COAD	TCGA-CK-5914-01	41	288
Tumor	COAD	TCGA-D5-6532-01	41	288
Tumor	COAD	TCGA-3L-AA1B-01	41	288
Tumor	COAD	TCGA-G4-6588-01	41	288
Tumor	COAD	TCGA-A6-6138-01	41	288
Tumor	COAD	TCGA-F4-6808-01	41	288
Tumor	COAD	TCGA-G4-6317-01	41	288
Tumor	COAD	TCGA-CK-4952-01	41	288
Tumor	COAD	TCGA-G4-6309-01	41	288
Tumor	COAD	TCGA-CM-5868-01	41	288
Tumor	COAD	TCGA-AD-6964-01	41	288
Tumor	COAD	TCGA-G4-6295-01	41	288
Tumor	COAD	TCGA-NH-A50T-01	41	288
Tumor	COAD	TCGA-D5-5539-01	41	288
Tumor	COAD	TCGA-AZ-4315-01	41	288
Tumor	COAD	TCGA-AA-3506-01	41	288
Tumor	COAD	TCGA-G4-6314-01	41	288
Tumor	COAD	TCGA-AU-6004-01	41	288
Tumor	COAD	TCGA-AY-6386-01	41	288
Tumor	COAD	TCGA-A6-5661-01	41	288
Tumor	COAD	TCGA-CA-5797-01	41	288
Normal	COAD	TCGA-AA-3712-11	41	288
Tumor	COAD	TCGA-A6-5662-01	41	288
Tumor	COAD	TCGA-AA-3489-01	41	288
Tumor	COAD	TCGA-DM-A1D8-01	41	288
Tumor	COAD	TCGA-AZ-6599-01	41	288
Tumor	COAD	TCGA-G4-6299-01	41	288
Tumor	COAD	TCGA-AD-5900-01	41	288
Tumor	COAD	TCGA-A6-5666-01	41	288
Tumor	COAD	TCGA-DM-A1D7-01	41	288
Tumor	COAD	TCGA-AA-A02Y-01	41	288
Tumor	COAD	TCGA-CM-6676-01	41	288
Tumor	COAD	TCGA-G4-6626-01	41	288
Tumor	COAD	TCGA-AA-3660-01	41	288
Tumor	COAD	TCGA-NH-A8F7-01	41	288
Tumor	COAD	TCGA-AA-3712-01	41	288
Tumor	COAD	TCGA-CM-4743-01	41	288
Tumor	COAD	TCGA-G4-6315-01	41	288
Tumor	COAD	TCGA-CM-4747-01	41	288
Tumor	COAD	TCGA-AZ-6606-01	41	288
Tumor	COAD	TCGA-DM-A285-01	41	288
Tumor	COAD	TCGA-A6-6142-01	41	288
Tumor	COAD	TCGA-CM-6171-01	41	288
Tumor	COAD	TCGA-A6-2675-01	41	288
Tumor	COAD	TCGA-G4-6298-01	41	288
Tumor	COAD	TCGA-CM-6163-01	41	288
Tumor	COAD	TCGA-A6-6650-01	41	288
Tumor	COAD	TCGA-AM-5820-01	41	288
Tumor	COAD	TCGA-A6-6654-01	41	288
Tumor	COAD	TCGA-CK-5912-01	41	288
Tumor	COAD	TCGA-CM-5349-01	41	288
Tumor	COAD	TCGA-DM-A28A-01	41	288
Normal	COAD	TCGA-F4-6704-11	41	288
Tumor	COAD	TCGA-WS-AB45-01	41	288
Tumor	COAD	TCGA-CM-6677-01	41	288
Tumor	COAD	TCGA-AD-6548-01	41	288
Tumor	COAD	TCGA-AA-3509-01	41	288
Tumor	COAD	TCGA-D5-6926-01	41	288
Normal	COAD	TCGA-AZ-6598-11	41	288
Tumor	COAD	TCGA-AZ-4616-01	41	288
Normal	COAD	TCGA-A6-5659-11	41	288
Tumor	COAD	TCGA-AA-A02K-01	41	288
Tumor	COAD	TCGA-D5-6898-01	41	288
Tumor	COAD	TCGA-A6-2685-01	41	288
Tumor	COAD	TCGA-DM-A1HA-01	41	288
Tumor	COAD	TCGA-DM-A280-01	41	288
Tumor	COAD	TCGA-AA-3713-01	41	288
Tumor	COAD	TCGA-AA-3502-01	41	288
Tumor	COAD	TCGA-CK-5913-01	41	288
Tumor	COAD	TCGA-4N-A93T-01	41	288
Tumor	COAD	TCGA-F4-6855-01	41	288
Normal	COAD	TCGA-AZ-6603-11	41	288
Tumor	COAD	TCGA-QG-A5YV-01	41	288
Tumor	COAD	TCGA-CM-6166-01	41	288
Tumor	COAD	TCGA-G4-6321-01	41	288
Tumor	COAD	TCGA-D5-6539-01	41	288
Tumor	COAD	TCGA-CM-5344-01	41	288
Tumor	COAD	TCGA-A6-2674-01	41	288
Tumor	COAD	TCGA-D5-6536-01	41	288
Tumor	COAD	TCGA-A6-6140-01	41	288
Tumor	COAD	TCGA-A6-A566-01	41	288
Tumor	COAD	TCGA-A6-6141-01	41	288
Tumor	COAD	TCGA-D5-5541-01	41	288
Tumor	COAD	TCGA-AM-5821-01	41	288
Tumor	COAD	TCGA-AD-6901-01	41	288
Tumor	COAD	TCGA-CM-6161-01	41	288
Tumor	COAD	TCGA-5M-AAT5-01	41	288
Tumor	COAD	TCGA-CK-6748-01	41	288
Tumor	COAD	TCGA-D5-6540-01	41	288
Normal	COAD	TCGA-A6-5665-11	41	288
Tumor	COAD	TCGA-AZ-4684-01	41	288
Tumor	COAD	TCGA-5M-AAT6-01	41	288
Normal	COAD	TCGA-AA-3517-11	41	288
Tumor	COAD	TCGA-G4-6302-01	41	288
Tumor	COAD	TCGA-G4-6310-01	41	288
Tumor	COAD	TCGA-NH-A6GA-01	41	288
Tumor	COAD	TCGA-AA-3655-01	41	288
Normal	COAD	TCGA-A6-2678-11	41	288
Tumor	COAD	TCGA-A6-6652-01	41	288
Tumor	COAD	TCGA-CM-5863-01	41	288
Tumor	COAD	TCGA-CM-6678-01	41	288
Tumor	COAD	TCGA-D5-6529-01	41	288
Tumor	COAD	TCGA-T9-A92H-01	41	288
Tumor	COAD	TCGA-A6-5657-01	41	288
Tumor	COAD	TCGA-D5-6930-01	41	288
Tumor	COAD	TCGA-QL-A97D-01	41	288
Tumor	COAD	TCGA-D5-7000-01	41	288
Tumor	COAD	TCGA-D5-5537-01	41	288
Tumor	COAD	TCGA-CM-5860-01	41	288
Tumor	COAD	TCGA-AA-A01P-01	41	288
Tumor	COAD	TCGA-CK-4950-01	41	288
Normal	COAD	TCGA-AA-3534-11	41	288
Normal	COAD	TCGA-A6-2679-11	41	288
Tumor	COAD	TCGA-SS-A7HO-01	41	288
Tumor	COAD	TCGA-D5-6537-01	41	288
Tumor	COAD	TCGA-CA-5254-01	41	288
Tumor	COAD	TCGA-AD-A5EK-01	41	288
Tumor	COAD	TCGA-CK-6746-01	41	288
Tumor	COAD	TCGA-CA-6718-01	41	288
Tumor	COAD	TCGA-AY-5543-01	41	288
Tumor	COAD	TCGA-F4-6807-01	41	288
Tumor	COAD	TCGA-CK-5915-01	41	288
Tumor	COAD	TCGA-A6-3810-01	41	288
Normal	COAD	TCGA-AA-3660-11	41	288
Tumor	COAD	TCGA-A6-6781-01	41	288
Normal	COAD	TCGA-AZ-6605-11	41	288
Tumor	COAD	TCGA-NH-A50U-01	41	288
Tumor	COAD	TCGA-AU-3779-01	41	288
Normal	COAD	TCGA-AZ-6601-11	41	288
Tumor	COAD	TCGA-DM-A1D4-01	41	288
Tumor	COAD	TCGA-G4-6304-01	41	288
Tumor	COAD	TCGA-CA-6717-01	41	288
Tumor	COAD	TCGA-DM-A1D0-01	41	288
Normal	COAD	TCGA-A6-2671-11	41	288
Tumor	COAD	TCGA-CM-6675-01	41	288
Normal	COAD	TCGA-A6-2680-11	41	288
Tumor	COAD	TCGA-AZ-4313-01	41	288
Normal	COAD	TCGA-AA-3511-11	41	288
Tumor	COAD	TCGA-G4-6307-01	41	288
Tumor	COAD	TCGA-AZ-5403-01	41	288
Tumor	COAD	TCGA-CM-5861-01	41	288
Tumor	COAD	TCGA-CA-5796-01	41	288
Tumor	COAD	TCGA-AZ-4323-01	41	288
Tumor	COAD	TCGA-D5-6928-01	41	288
Tumor	COAD	TCGA-AA-3685-01	41	288
Normal	COAD	TCGA-AA-3520-11	41	288
Normal	COAD	TCGA-AA-3489-11	41	288
Tumor	COAD	TCGA-A6-5664-01	41	288
Tumor	COAD	TCGA-AZ-5407-01	41	288
Normal	COAD	TCGA-AA-3496-11	41	288
Tumor	COAD	TCGA-AY-6196-01	41	288
Tumor	COAD	TCGA-D5-6920-01	41	288
Tumor	COAD	TCGA-G4-6297-01	41	288
Tumor	COAD	TCGA-A6-2686-01	41	288
Tumor	COAD	TCGA-DM-A28F-01	41	288
Tumor	COAD	TCGA-CA-5256-01	41	288
Tumor	COAD	TCGA-A6-2682-01	41	288
Tumor	COAD	TCGA-AZ-6608-01	41	288
Normal	COAD	TCGA-A6-5667-11	41	288
Tumor	COAD	TCGA-G4-6306-01	41	288
Normal	COAD	TCGA-AA-3525-11	41	288
Tumor	COAD	TCGA-D5-6922-01	41	288
Tumor	COAD	TCGA-CK-5916-01	41	288
Tumor	COAD	TCGA-DM-A288-01	41	288
Normal	COAD	TCGA-AZ-6600-11	41	288
Tumor	COAD	TCGA-DM-A1HB-01	41	288
Tumor	COAD	TCGA-CM-6170-01	41	288
Tumor	COAD	TCGA-CK-4948-01	41	288
Tumor	COAD	TCGA-AA-3662-01	41	288
Tumor	COAD	TCGA-CM-6165-01	41	288
Tumor	COAD	TCGA-F4-6856-01	41	288
Tumor	COAD	TCGA-F4-6569-01	41	288
Tumor	COAD	TCGA-D5-6535-01	41	288
Tumor	COAD	TCGA-AA-3526-01	41	288
Normal	COAD	TCGA-AA-3514-11	41	288
Tumor	COAD	TCGA-AD-6895-01	41	288
Tumor	COAD	TCGA-NH-A8F8-01	41	288
Tumor	COAD	TCGA-D5-6929-01	41	288
Tumor	COAD	TCGA-A6-5667-01	41	288
Tumor	COAD	TCGA-CM-6169-01	41	288
Tumor	COAD	TCGA-CM-6680-01	41	288
Tumor	COAD	TCGA-AA-3663-01	41	288
Tumor	COAD	TCGA-A6-6648-01	41	288
Tumor	COAD	TCGA-RU-A8FL-01	41	288
Tumor	COAD	TCGA-CA-6719-01	41	288
Tumor	COAD	TCGA-A6-6649-01	41	288
Tumor	COAD	TCGA-NH-A6GB-01	41	288
Tumor	COAD	TCGA-AZ-4614-01	41	288
Tumor	COAD	TCGA-A6-3809-01	41	288
Tumor	COAD	TCGA-CM-5864-01	41	288
Normal	COAD	TCGA-A6-5662-11	41	288
Normal	COAD	TCGA-AZ-6599-11	41	288
Normal	COAD	TCGA-AA-3655-11	41	288
Tumor	COAD	TCGA-D5-6927-01	41	288
Tumor	COAD	TCGA-QG-A5YW-01	41	288
Tumor	COAD	TCGA-AA-A01X-01	41	288
Tumor	COAD	TCGA-D5-6538-01	41	288
Tumor	COAD	TCGA-CM-6172-01	41	288
[truncated: 7,782 more rows]
